# Supplementary material for: Electrodialysis and nitrate reduction (EDNR) to enable distributed ammonia manufacturing from wastewaters
Source: Royal Society of Chemistry journal article supplement (doi:10.1039/d4ee03002h), 2024-01-01
Supplement: d4ee03002h1.pdf [file d4ee03002h1.pdf]

*Supporting Information for*

# **Electrodialysis and Nitrate Reduction (EDNR) to Enable Distributed Ammonia Manufacturing from Wastewaters**

Jinyu Guo,<sup>†</sup> Matthew J. Liu,<sup>†</sup> Chloe Laguna,<sup>†</sup> Dean M. Miller,<sup>†</sup> Kindle Williams,<sup>†</sup> Brandon D. Clark,<sup>†</sup> Carolina Muñoz,<sup>†</sup> Sarah J. Blair,<sup>†</sup> Adam C. Nielander,<sup>‡</sup> Thomas F. Jaramillo,<sup>†,‡</sup> William A. Tarpeh<sup>†,‡,\*</sup>

<sup>†</sup>Department of Chemical Engineering, Stanford University, Stanford, CA, 94305, USA

<sup>‡</sup> SUNCAT Center for Interface Science and Catalysis, SLAC National Accelerator Laboratory, Menlo Park, CA, USA

*56 pages*  
*8 tables*  
*40 figures*  
*15 equations*

\*Corresponding author, Email: wtarpeh@stanford.edu. Address: 443 Via Ortega, Room 387, Stanford CA, 94305. Telephone: 650-497-1324

## Table of Contents

|                                                                                        |           |
|----------------------------------------------------------------------------------------|-----------|
| <b>Section S1. Experimental methods.....</b>                                           | <b>3</b>  |
| Section S1.1 Chemicals .....                                                           | 3         |
| Section S1.2 EDNR experiment procedures .....                                          | 4         |
| Section S1.3 NR environment engineering experiment procedures .....                    | 7         |
| Section S1.4 Long-term EDNR experiment procedures .....                                | 8         |
| Section S1.5 Sample analysis.....                                                      | 10        |
| Section S1.6 Summary of reaction conditions.....                                       | 12        |
| Section S1.7 Key performance metrics.....                                              | 13        |
| Section S1.9 Nitrate concentrations used in typical fundamental research .....         | 16        |
| <b>Section S2. Transference number calculations .....</b>                              | <b>17</b> |
| <b>Section S3. Supplementary results .....</b>                                         | <b>20</b> |
| Section S3.1 Proof-of-concept EDNR.....                                                | 20        |
| Section S3.2 Engineering of EDNR operating parameters .....                            | 21        |
| Section S3.2.1 Reaction environment effects on nitrate reduction reaction .....        | 21        |
| Section S3.2.2 Implementation of NR environment engineering to EDNR.....               | 25        |
| Section S3.2.3 Influence of ED stage operating parameters .....                        | 29        |
| Section S3.3 Impacts of influent compositions on EDNR performance.....                 | 33        |
| Section S3.3.1 Modified simulated wastewater .....                                     | 33        |
| Section S3.3.2 Real wastewaters .....                                                  | 39        |
| Section S3.4 Long-term EDNR and product purification to treat agricultural runoff..... | 44        |
| <b>References .....</b>                                                                | <b>54</b> |

## Section S1. Experimental methods

### Section S1.1 Chemicals

All chemical reagents were purchased from commercial vendors and used as received. Reagents used included titanium foil (Ti, 99.7%, 0.25 mm, Sigma-Aldrich), platinum foil (Pt, 99.99%, Sigma-Aldrich), IrO<sub>2</sub>-Ta<sub>2</sub>O<sub>5</sub>/Ti mesh electrodes (Magneto Special Anodes, Schiedam), sodium perchlorate ( $\geq 98.0\%$ , Sigma-Aldrich), sodium nitrate ( $\geq 99.0\%$ , Sigma-Aldrich), nitric acid (67–70%, Fisher Chemical), potassium chloride ( $\geq 99.0\%$ , Sigma-Aldrich), sodium sulfate ( $\geq 99.0\%$ , Sigma-Aldrich), sodium chloride ( $\geq 99.0\%$ , Fisher BioReagents), sodium phosphate dibasic ( $\geq 99\%$ , Calbiochem), sodium citrate dihydrate (99.0–101.0%, Avantor Performance Materials), sodium nitroferricyanide dihydrate (Acros Organics), sodium hydroxide ( $\geq 97.0\%$ , Ricca Chemical), sodium hypochlorite (10–15% available chlorine, Sigma-Aldrich), Dionex AS22 effluent concentrate (450 mM sodium carbonate, 140 mM sodium bicarbonate, Thermo Fisher), Dionex six cation-I standard (Thermo Fisher, 040187), Dionex seven anion standard (Thermo Fisher, 056933), phenol ( $\geq 99.0\%$ , Sigma-Aldrich), isopropyl alcohol (99.5%, Acros Organics), L-(+)-tartaric acid ( $\geq 99.5\%$ , Sigma-Aldrich), oxalic acid (98%, Sigma-Aldrich). Nanopure water (resistivity: 18.2 M $\Omega$ -cm, Millipore Sigma) was used for all experiments and measurements.

As-received platinum and titanium foil was cut into 5 cm  $\times$  2.5 cm pieces. All electrodes used in the experiment and cleaned through 5-minute ultrasonication (150 W ultrasonic power, 40 kHz frequency) in isopropyl alcohol followed by 5-minute ultrasonication in water, and dried using compressed air. A new piece of titanium foil was used for each EDNR experiment, while the platinum foil and IrO<sub>2</sub>-Ta<sub>2</sub>O<sub>5</sub>/Ti mesh electrodes were cleaned as described above and reused.

### Section S1.2 EDNR experiment procedures

All EDNR experiments took place in a polycarbonate, three-chamber compression cell with electrolyte flowing through each chamber from recirculation bottles, entering the cell through the bottom and exiting from the top (schematic shown in **Fig. S1**). Each recirculation bottle held 50 mL of respective electrolyte: NH<sub>3</sub> synthesis and NH<sub>3</sub> recovery chambers both held 0.1 M KClO<sub>4</sub> (in proof-concept) or 1 M NaClO<sub>4</sub> (in all other EDNR experiments), and the influent chamber held simulated or real wastewaters. The electrolyte flow rate was controlled by peristaltic pumps

(Masterflex model 07528-10 motor and model 77800-60 pump head, with 1/16-inch inner diameter tubing), and was constant for each experiment but differed between experiments (particularly those in which we probed the influence of flow rate on performance metrics). Note that an anion exchange membrane (AEM, two different types were used, as shown in Table 1 in the main manuscript) separated the NH<sub>3</sub> synthesis (left) and influent (middle) chambers, and a cation exchange membrane (CEM, CMI-7000, Membranes International) separated the influent (middle) and NH<sub>3</sub> recovery (right) chambers. Both AEM and CEM were immersed in 1 M NaClO<sub>4</sub> for over 24 hours before use to ensure proper hydration and expansion, and new pieces of membranes were used in each EDNR experiment. The cell consisted of one Ti electrode, two IrO<sub>2</sub>-Ta<sub>2</sub>O<sub>5</sub>/Ti mesh electrodes, and one Pt electrode; these four electrodes were necessary to enable dynamic electrochemical bias switching between the electro dialysis (ED) stage and the nitrate reduction (NR) stage. In preparation for the experiment, the electrolyte was pumped through the cell for 15 minutes, after which the pumps were stopped, initial samples of 1 mL were taken from each recirculation bottle, and an initial potentiostatic electrochemical impedance spectroscopy (PEIS) at the open circuit voltage (OCV) was performed. Pumps were then turned back on.

A potentiostat (VSP, BioLogic for all experiments) was used to control the applied potential to the working electrode versus the leakless Ag/AgCl reference electrode (3.4 M KCl, ET072-1, eDAQ). All potentials were converted to the RHE scale with:  $E_{Ag/AgCl} = E_{RHE} - 0.205 V - 0.059 \times pH$ . All electrochemical experiments were conducted using 85% IR compensation based on the ohmic resistance obtained via PEIS.

(a)

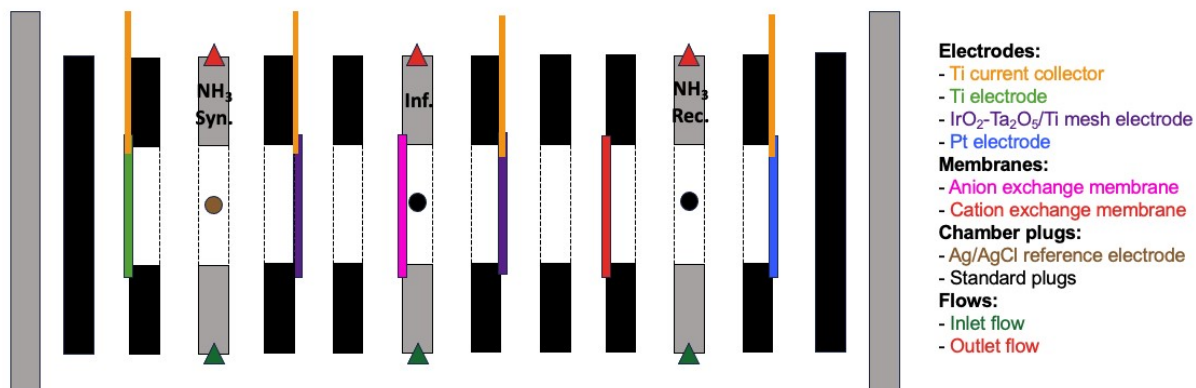

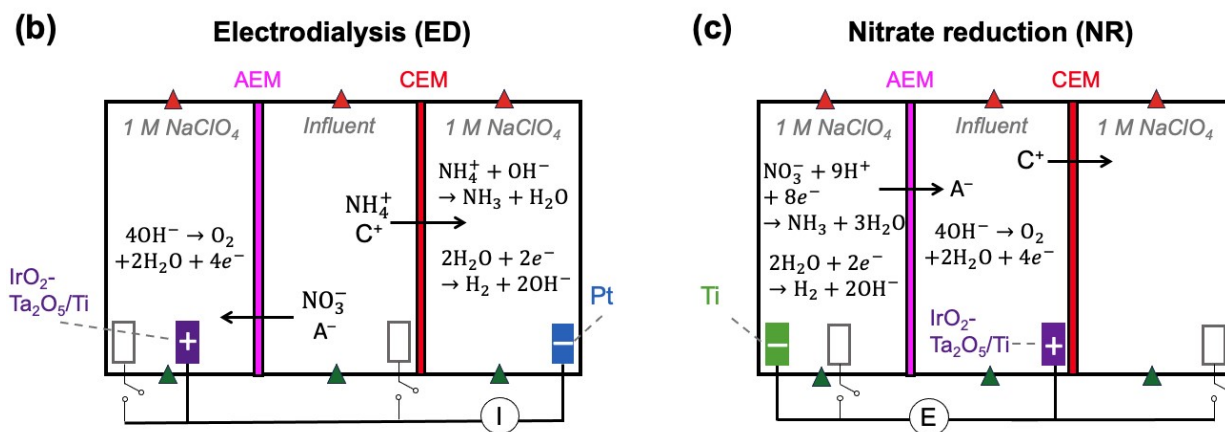

**Figure S1.** (a) Schematic of the EDNR reactor (side-view). Polycarbonate cell parts are shown in gray boxes; rubber gaskets are shown in black boxes, with dotted lines representing openings in the material. Triangles represent electrolyte ports, circles represent reference electrode or plugs, and colored squares represent electrodes or membranes, whose information is given by correspondingly colored legends. (b) Major electrode reactions and ion movement during the electrolysis (ED) stage.  $C^+$  represents cations, and  $A^-$  represents anions. (c) Major electrode reactions and ion movement during the nitrate reduction (NR) stage. Note that the electrolyte used in  $NH_3$  synthesis and recovery chambers was 0.1 M  $KClO_4$  in the proof-of-concept experiment and 1 M  $NaClO_4$  in all other experiments, as shown in (b) and (c). Additional experimental parameters are given in **Table S1**.

### A. Electrolysis (ED)

As the first stage of each cycle, electrolysis (ED) was performed using  $IrO_2-Ta_2O_5/Ti$  mesh as the working electrode in the  $NH_3$  synthesis chamber and Pt foil as the counter electrode in the  $NH_3$  recovery chamber (**Fig. S2**). Note that no  $NH_3$  synthesis is occurring during this stage, but the  $NH_3$  synthesis chamber is named as such because it is the site of nitrate reduction to  $NH_3$  in the second stage of each cycle. A constant current was applied for durations specified in **Table S1**. When necessary to avoid exceeding the full cell voltage limit, a lower current was applied over an extended ED duration to achieve the same charge passed. After experiment completion, the peristaltic pumps were stopped, and electrolyte samples of 1 mL were taken from each electrolyte reservoir in preparation for the second stage.

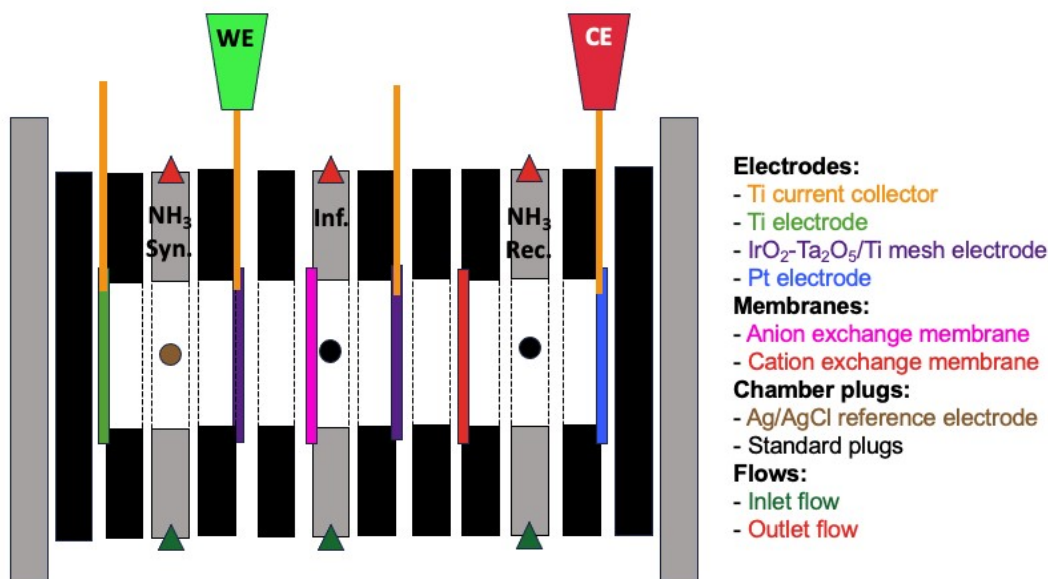

**Figure S2.** Schematic showing electrode connections to the potentiostat for electrodiagnosis (ED) stages. WE represents the working electrode, and CE represents the counter electrode. All other symbols follow the same convention as in **Fig. S1**: polycarbonate cell parts are shown in gray boxes; rubber gaskets are shown in black boxes, with dotted lines representing openings in the material. Triangles represent electrolyte ports, circles represent reference electrode or plugs, and colored squares represent electrodes or membranes, whose information is given by colored legends.

## B. Nitrate reduction (NR)

Once electrodiagnosis was completed, nitrate reduction (NR) was performed as the second stage in every cycle. NR was performed using the Ti foil in the NH<sub>3</sub> synthesis chamber as the working electrode and the IrO<sub>2</sub>-Ta<sub>2</sub>O<sub>5</sub>/Ti mesh in the influent chamber as the counter electrode (**Fig. S3**). PEIS was measured before peristaltic pumps were turned on. Nitrate reduction was then performed at  $-1.0$  vs. RHE in a potentiostatic manner for 120 min (in proof-concept), or at  $-0.8$  V vs. RHE in a pulsed potential manner ( $E_C = -0.8$  V vs. RHE for  $t_C = 10$  s, followed by  $E_A = \text{OCV}$  for  $t_A = 10$  s) for a total duration of 120 min (in all other EDNR experiments).

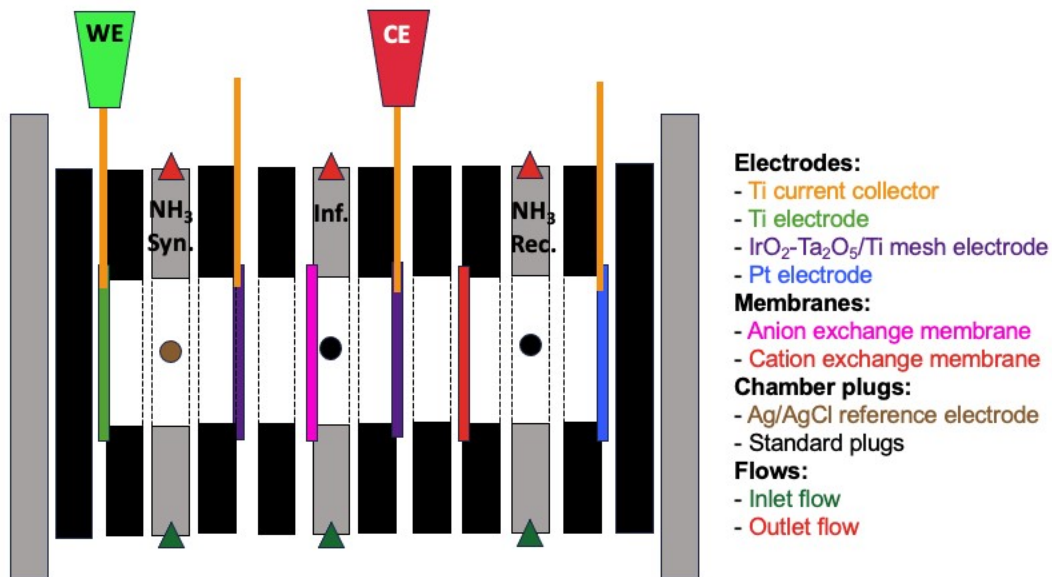

**Figure S3.** Schematic showing electrode connections to the potentiostat for nitrate reduction (NR) stages. WE represents the working electrode, and CE represents the counter electrode. All other symbols follow the same convention as in **Fig. S1**: polycarbonate cell parts are shown in gray boxes; rubber gaskets are shown in black boxes, with dotted lines representing openings in the material. Triangles represent electrolyte ports, circles represent reference electrode or plugs, and colored squares represent electrodes or membranes, whose information is given by colored legends.

### **Section S1.3 NR environment engineering experiment procedures**

NR environment engineering experiments were performed in a polycarbonate, two-chamber compression cell divided by an anion exchange membrane (Selemion AMVN, same as in optimized NR), with a Ti working electrode, a Pt counter electrode chamber, and a Ag/AgCl reference electrode (**Fig. S4**). Each chamber held 10 mL of electrolyte, and the electrolytes were static during experiments (*i.e.*, no pumping, gas purging, or mechanical mixing).

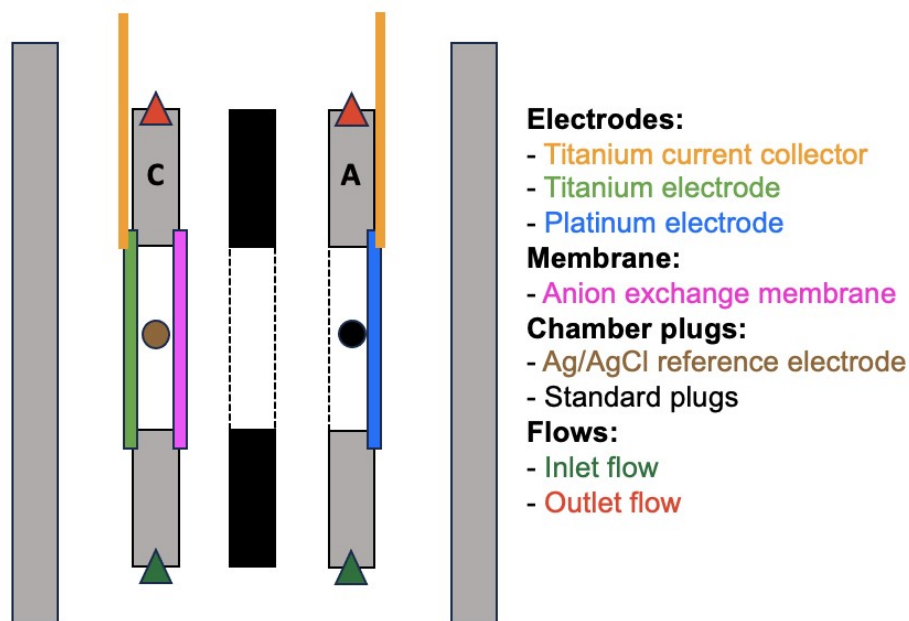

**Figure S4.** Schematic of electrolyte effects cell system. C represents the cathode, and A represents the anode. All other symbols follow the same convention as in **Fig. S1**: polycarbonate cell parts are shown in gray boxes; rubber gaskets are shown in black boxes, with dotted lines representing openings in the material. Triangles represent electrolyte ports, circles represent reference electrode or plugs, and colored squares represent electrodes or membranes, whose information is given by colored legends.

At the beginning of each experiment, 11 mL of electrolyte was added into the working and counter electrode chambers, respectively; 1 mL of electrolyte was taken from each chamber as the initial samples, leaving 10 mL in each chamber for the electrochemical experiment. PEIS was then conducted. Nitrate reduction was then performed at  $-0.8$  V vs. RHE in a potentiostatic manner for 30 min. After the experiment, electrolytes were collected, and pH was adjusted as needed for product analysis (**Section S1.5**).

#### **Section S1.4 Long-term EDNR experiment procedures**

To test the long-term stability of the EDNR process, 4-cycle EDNR experiments were operated for five batches, treating 50 mL of fresh  $\text{NH}_4^+$ -enriched agricultural runoff influent in each batch. The operating parameters are given in **Table S1**. After the last NR stage in each batch (i.e., NR4), chronopotentiometry at  $-5.26$  mA/cm<sup>2</sup> was applied to the Ti electrode for 15 min to basify the  $\text{NH}_3$  synthesis chamber electrolyte and facilitate subsequent  $\text{NH}_3$  extraction.



After each 4-cycle EDNR batch, we immediately pumped the  $\text{NH}_3$ -rich electrolytes from the  $\text{NH}_3$  synthesis and recovery chambers in the EDNR reactor to the left and right feed chambers of a membrane stripping reactor, respectively. The middle chamber of the membrane stripping cell was a shared acid trap divided from the feed chambers with gas permeable membranes (Aquastill) on each side, and the acid trap was 20 mL of 42 mM  $\text{H}_3\text{PO}_4$  (**Fig. S5**). In the membrane stripping reactor, volatile  $\text{NH}_3$  in the feed chambers was extracted across two gas permeable membranes into  $\text{H}_3\text{PO}_4$  solution in the acid trap chamber. All solutions were recirculated at 3.5 mL/min overnight, without any applied potential/current. After  $\text{NH}_3$  extraction, 0.5 mL of liquid sample was drawn from the acid trap chamber, and the  $\text{NH}_3$ -depleted solutions in the feed chambers were directly reused as  $\text{NH}_3$  synthesis and recovery chamber background electrolytes to minimize chemical input in the integrated unit process.

Before starting the next EDNR batch, 8 mL of fresh 1 M  $\text{NaClO}_4$  was added to the  $\text{NH}_3$  synthesis and to the recovery chambers to compensate for electrolyte volume loss due to sampling. The integrated 4-cycle EDNR (12-hr) + membrane stripping (overnight) unit process was conducted for five consecutive days, and a total of 250 mL  $\text{NH}_4^+$ -enriched agricultural runoff was processed.

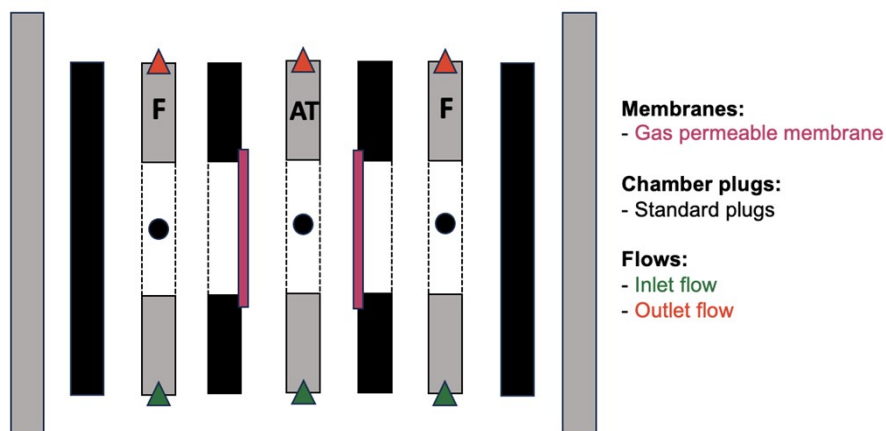

**Figure S5.** Schematic of membrane stripping cell. F represents feed, and AT represents acid trap. Inlet flows are shown in green, outlet flows are shown in red, and gas permeable membranes are shown in dark magenta. All other symbols follow the same convention as in **Fig. S1**: polycarbonate cell parts are shown in gray boxes; rubber gaskets are shown in black boxes, with dotted lines showing openings in the material. Triangles represent electrolyte ports and circles represent plugs.

### **Section S1.5 Sample analysis**

Aqueous samples were analyzed using ion chromatography (ICS-6000, Dionex) and a flow injection analyzer (AA500 AutoAnalyzer, SEAL Analytical). To quantify  $\text{Na}^+$ , the sample aliquots were diluted 1000 times with nanopure water and analyzed using cation chromatography with 4 mM tartaric acid/2 mM oxalic acid eluent, SCS 1 column at 30 °C. The calibration range was 0.43–1.74 mM, and representative calibration data was shown in **Fig. S6a**. To quantify  $\text{NO}_3^-$ ,  $\text{NO}_2^-$ , and  $\text{ClO}_4^-$  concentrations, the sample aliquots were basified with 5 wt% NaOH to pH > 10 (ensuring the complete dissociation of produced  $\text{HNO}_2$  to the detectable  $\text{NO}_2^-$  anion form; pKa 3.16), diluted 30 times (for  $\text{NO}_3^-$  and  $\text{NO}_2^-$  quantification) or 500 times (for  $\text{ClO}_4^-$  quantification) with nanopure water and analyzed using anion chromatography with 4.5 mM  $\text{CO}_3^{2-}$ /0.8 mM  $\text{HCO}_3^-$  eluent and a AS23-4  $\mu\text{m}$  column at 30 °C. The calibration range was 0.01–0.32 mM for  $\text{NO}_3^-$ , 0.01–0.44 mM for  $\text{NO}_2^-$ , and 0.5–10 mM for  $\text{ClO}_4^-$ ; representative calibration data was shown in **Fig. S6b–d**. To quantify the concentration of  $\text{NH}_3$ , parallel sample aliquots were acidified with 2 M  $\text{HClO}_4$  to pH < 2 (ensuring the complete protonation of produced  $\text{NH}_3$  to the more stable  $\text{NH}_4^+$  form; pKa 9.25) and analyzed using spectrophotometric flow injection analysis with the phenate method.<sup>1</sup> All bulk pH measurements were conducted using a pH meter (FiveEasy, Mettler Toledo). Note that all error bars shown in this manuscript represent  $\pm$  one standard deviation from triplicate experiments, rather than triplicate sample analysis. Scanning electron microscopy (SEM) was performed using a Thermo Fisher Scientific Apreo S LoVac microscope, and energy dispersive X-ray spectroscopy (EDS) was carried out with a Bruker Quantax XFlash 6|60 EDS detector to analyze the elemental distribution on the electrodes and membrane surfaces. The membrane samples were mounted on aluminum pin stubs and sputter coated with gold to enhance the conductivity of the imaging surface. SEM images and EDS elemental maps were acquired at two locations on each sample.

Total organic and inorganic carbon (TOC and TIC) were measured using a Shimadzu TOC-L autoanalyzer (Shimadzu Scientific Instruments, Inc., Columbia, MD) at Environmental Measurements Facility at Stanford University.

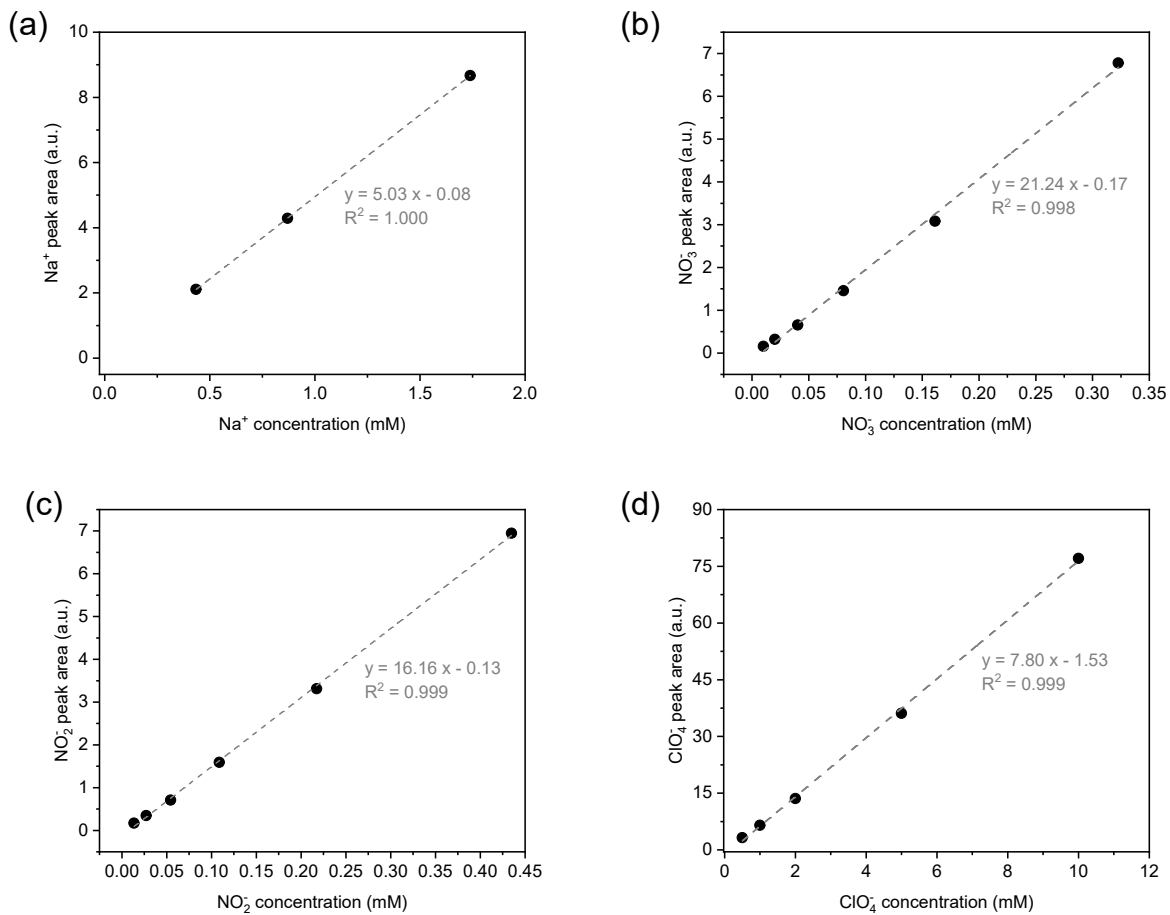

**Figure S6. Ion chromatography calibration.** (a) Na<sup>+</sup>, (b) NO<sub>3</sub><sup>-</sup>, (c) NO<sub>2</sub><sup>-</sup>, and (d) ClO<sub>4</sub><sup>-</sup>. Dotted lines show linear fitting of calibration data.

## Section S1.6 Summary of reaction conditions

**Table S1.** Summary of electrolyte compositions and operating parameters used in EDNR experiments in this study.

| Experiment sets                      | NH <sub>3</sub> Syn. Electrolyte | Influent                                                                                                   | NH <sub>3</sub> Rec. Electrolyte                                                   | Electrolyte flow rate (mL/min) |                                        | ED1 j <sub>app</sub> (mA/cm <sup>2</sup> ) | ED1 duration (min) | ED2 and ED3 j <sub>app</sub> (mA/cm <sup>2</sup> )                      | ED2 and ED3 duration (min)                                                                                                 | NR E <sub>app</sub> (V vs. RHE)*                                                                 | NR duration (min)* |                  |
|--------------------------------------|----------------------------------|------------------------------------------------------------------------------------------------------------|------------------------------------------------------------------------------------|--------------------------------|----------------------------------------|--------------------------------------------|--------------------|-------------------------------------------------------------------------|----------------------------------------------------------------------------------------------------------------------------|--------------------------------------------------------------------------------------------------|--------------------|------------------|
|                                      |                                  |                                                                                                            |                                                                                    | ED                             | NR                                     |                                            |                    |                                                                         |                                                                                                                            |                                                                                                  |                    |                  |
| Proof-of-concept                     | 0.1 M KClO <sub>4</sub>          | Simulated wastewater (13.9 mM (NH <sub>4</sub> ) <sub>2</sub> SO <sub>4</sub> + 1.61 mM KNO <sub>3</sub> ) | 0.1 M KClO <sub>4</sub>                                                            | 30                             | 30                                     | 2.63                                       | 60                 | 2.63                                                                    | 60                                                                                                                         | -0.6                                                                                             | 120                |                  |
| Optimized NR                         | 1 M NaClO <sub>4</sub>           |                                                                                                            | 13.9 mM (NH <sub>4</sub> ) <sub>2</sub> SO <sub>4</sub> + 26.4 mM KNO <sub>3</sub> | 1 M NaClO <sub>4</sub>         | 30                                     | 100                                        | 3.95               | 60                                                                      | 3.95                                                                                                                       | 60                                                                                               | -0.8 (pulsed)      | 120 <sup>#</sup> |
| Shortened ED                         |                                  |                                                                                                            |                                                                                    |                                | 30                                     | 100                                        | 3.95               | 60                                                                      | 3.95                                                                                                                       | 30                                                                                               |                    |                  |
| Shortened ED + High flow             |                                  | 100                                                                                                        |                                                                                    |                                | 100                                    | 3.95                                       | 60                 | 3.95                                                                    | 30                                                                                                                         |                                                                                                  |                    |                  |
| NO <sub>3</sub> <sup>-</sup> -laden  |                                  | 30                                                                                                         | 100                                                                                |                                | 3.95                                   | 60                                         | 3.95               | 60                                                                      |                                                                                                                            |                                                                                                  |                    |                  |
| SO <sub>4</sub> <sup>2-</sup> -laden |                                  |                                                                                                            |                                                                                    |                                |                                        |                                            |                    |                                                                         | 13.9 mM (NH <sub>4</sub> ) <sub>2</sub> SO <sub>4</sub> + 1.61 mM KNO <sub>3</sub> + 50 mM Na <sub>2</sub> SO <sub>4</sub> |                                                                                                  |                    |                  |
| Cl <sup>-</sup> -laden               |                                  |                                                                                                            |                                                                                    |                                |                                        |                                            |                    |                                                                         |                                                                                                                            | 13.9 mM (NH <sub>4</sub> ) <sub>2</sub> SO <sub>4</sub> + 1.61 mM KNO <sub>3</sub> + 100 mM NaCl |                    |                  |
| RO retentate                         |                                  |                                                                                                            |                                                                                    |                                |                                        |                                            |                    |                                                                         |                                                                                                                            |                                                                                                  |                    |                  |
| Well water                           |                                  | NH <sub>4</sub> <sup>+</sup> -enriched well water                                                          |                                                                                    |                                |                                        |                                            |                    |                                                                         |                                                                                                                            |                                                                                                  |                    |                  |
| Agricultural runoff                  |                                  | NH <sub>4</sub> <sup>+</sup> -enriched agricultural runoff                                                 |                                                                                    |                                |                                        |                                            |                    |                                                                         |                                                                                                                            |                                                                                                  |                    |                  |
| Agricultural runoff (4-cycle)        |                                  | 30                                                                                                         | 100                                                                                |                                | 3.95                                   | 53.5 <sup>†</sup>                          | 3.95               | 50 (ED2) <sup>†</sup><br>45 (ED3) <sup>†</sup><br>40 (ED4) <sup>†</sup> |                                                                                                                            |                                                                                                  |                    |                  |
| Agricultural runoff (long-term)      | 100 <sup>‡</sup>                 | 100                                                                                                        | 3.95                                                                               | 60                             | 2.93 (ED2)<br>2.16 (ED3)<br>2.12 (ED4) | 60                                         |                    |                                                                         |                                                                                                                            |                                                                                                  |                    |                  |

\* Same applied potentials and durations were used in all NR stages.

# For NR using pulsed potential, total NR duration is 120 min, and effective NR reaction time is 60 min.

† Durations of ED stages were shortened due to full cell voltage overload (20 V).

‡ A higher electrolyte flow rate was applied in ED stages to compensate for the decreased magnitude of applied current, which was intentionally lowered to avoid full cell voltage overload.

## Section S1.7 Key performance metrics

For brevity, NH<sub>3</sub> synthesis, influent, and NH<sub>3</sub> recovery chambers are represented by Syn, Inf, and Rec, respectively in the equations below.

### A. Electrodialysis (ED)

The following quantities were calculated to assess performance of the electrodialysis (ED) stage in EDNR.

NH<sub>4</sub><sup>+</sup> ED current efficiency (CE) in cycle  $i$ :

$$NH_4^+ ED CE_{Cycle\ i} (\%) = \frac{([NH_4^+]_{Inf, NR(i-1)} - [NH_4^+]_{Inf, EDi}) \times V_{Inf} \times F}{Q_{ED}} \times 100\% \quad \text{Eqn. S1}$$

where  $[NH_4^+]_{Inf, NR(i-1)}$  and  $[NH_4^+]_{Inf, EDi}$  are the NH<sub>4</sub><sup>+</sup> concentrations in the influent chamber before and after ED in cycle  $i$  (mM), respectively, and  $i-1=0$  represents the initial concentration before the EDNR experiment started;  $V_{Inf}$  is the total volume of the electrolyte in the influent chamber and its corresponding reservoir (50 mL);  $F$  is the Faraday constant (96485 C/mol); and  $Q_{ED}$  is the total charge passed during the ED stage (C).

NH<sub>4</sub><sup>+</sup> ED flux in cycle  $i$ :

$$NH_4^+ ED flux_{Cycle\ i} (mmol \cdot cm^{-2} \cdot min^{-1}) = \frac{([NH_4^+]_{Inf, NR(i-1)} - [NH_4^+]_{Inf, EDi}) \times V_{Inf}}{t_{ED} \times A_{ED}} \quad \text{Eqn. S2}$$

where  $t_{ED}$  is the operation duration of the ED stage (min), and  $A_{ED}$  is the cross-sectional area of EDNR reactor chambers (5.7 cm<sup>2</sup>).

Therefore,

$$NH_4^+ ED flux_{Cycle\ i} = NH_4^+ ED CE_{Cycle\ i} \times \frac{Q_{ED}}{t_{ED} \times A_{ED} \times F} \quad \text{Eqn. S3}$$

Similarly, NO<sub>3</sub><sup>-</sup> ED current efficiency in cycle  $i$ :

$$NO_3^- ED CE_{Cycle\ i} (\%) = \frac{([NO_3^-]_{Inf, NR(i-1)} - [NO_3^-]_{Inf, EDi}) \times V_{Inf} \times F}{Q_{ED}} \times 100\% \quad \text{Eqn. S4}$$

where  $[NO_3^-]_{Inf, NR(i-1)}$  and  $[NO_3^-]_{Inf, EDi}$  are the  $NO_3^-$  concentrations in the influent chamber before and after ED in cycle  $i$  (mM), respectively.

$NO_3^-$  ED flux in cycle  $i$ :

$$NO_3^- ED flux_{Cycle i} (mmol \cdot cm^{-2} \cdot min^{-1}) = \frac{([NO_3^-]_{Inf, NR(i-1)} - [NO_3^-]_{Inf, EDi}) \times V_{Inf}}{t_{ED} \times A_{ED}} \quad \text{Eqn. S5}$$

And

$$NO_3^- ED flux_{Cycle i} = NO_3^- ED CE_{Cycle i} \times \frac{Q_{ED}}{t_{ED} \times A_{ED} \times F} \quad \text{Eqn. S6}$$

ED stage energy consumption in cycle  $i$ :

ED stage energy consumption<sub>Cycle i</sub> (MJ/kg  $NH_3$ ) =

$$\frac{\int E_{cell} \times I dt}{([NH_3]_{Rec, EDi} - [NH_3]_{Rec, ED(i-1)}) \times V_{Rec} \times 17 \frac{g}{mol} \times \frac{1 kg}{1000 g}} \quad \text{Eqn. S7}$$

where  $E_{cell}$  is the full cell voltage during ED stage in cycle  $i$  (V),  $I$  is the applied current in ED (A), and the electrical power ( $E_{cell} \times I$ ) was integrated over the entire ED duration (J).  $[NH_3]_{Rec, EDi}$  and  $[NH_3]_{Rec, ED(i-1)}$  are the  $NH_3$  concentrations in the  $NH_3$  recovery chamber after ED in cycle  $i-1$  and cycle  $i$  (mM), respectively.  $V_{Rec}$  is the total volume of the electrolyte in the  $NH_3$  recovery chamber and its corresponding reservoir (50 mL).

## B. Nitrate reduction (NR)

The following quantities were calculated to assess performance of the nitrate reduction (NR) stage in EDNR and in two-chamber NR environment engineering experiments.

Total current density:

$$j_{tot}(mA/cm^2) = \frac{Q_{NR}}{t_{NR} \times A_{NR}} \quad \text{Eqn. S8}$$

where  $Q_{NR}$  is the total charge passed during the NR stage ( $mA \cdot s$ ),  $t_{NR}$  is the effective NR reaction time (the actual duration when a nitrate reduction potential was applied, s), and  $A_{NR}$  is the geometric area of the NR electrode ( $5.7 \text{ cm}^2$  in EDNR reactor and  $5.4 \text{ cm}^2$  in two-chamber reactor).

NH<sub>3</sub> partial current density:

$$j_{NH_3} (mA/cm^2) = j_{tot} \times FE_{NH_3} \quad \text{Eqn. S9}$$

where  $FE_{NH_3}$  is the Faradaic efficiency (%) of NH<sub>3</sub>, see **Eqn. S11**.

Time-averaged NR  $NO_3^-$  removal rate:

$$\begin{aligned} \text{NR } NO_3^- \text{ removal rate } (\mu mol \cdot cm^{-2} \cdot min^{-1}) \\ = \frac{([NO_3^-]_{Syn, NR(i-1)} - [NO_3^-]_{Syn, NRi}) \times V_{Syn}}{t_{NR} \times A_{NR}} \quad \text{Eqn. S10} \end{aligned}$$

where  $[NO_3^-]_{Syn, NR(i-1)}$  and  $[NO_3^-]_{Syn, NRi}$  are the  $NO_3^-$  concentrations in the NH<sub>3</sub> synthesis chamber after NR in cycle  $i-1$  and cycle  $i$  (mM), respectively, and  $V_{Syn}$  is the total volume of the electrolyte in the NH<sub>3</sub> synthesis chamber and its corresponding reservoir (50 mL). For two-chamber experiments,  $[NO_3^-]_{Syn, NR(i-1)}$  and  $[NO_3^-]_{Syn, NRi}$  are the initial and final concentrations of  $NO_3^-$  in the cathode chamber (mM), respectively, and  $V_{Syn}$  is the total volume of the electrolyte in the cathode chamber (10 mL).

Faradaic efficiency (FE) of product  $j$ :

$$FE_j(\%) = \frac{nF([product\ j]_{Syn, NRi} - [product\ j]_{Syn, NR(i-1)})V_{Syn}}{Q_{NR}} \times 100\% \quad \text{Eqn. S11}$$

where  $n$  is the stoichiometric number of electrons involved in the production of  $j$  ( $n = 2$  for  $NO_2^-$ , 8 for NH<sub>3</sub>), and  $[product\ j]_{Syn, NRi}$  and  $[product\ j]_{Syn, NR(i-1)}$  are the concentrations of  $j$  in the NH<sub>3</sub> synthesis chamber after NR in cycle  $i-1$  and cycle  $i$  (mM), respectively, or final and initial concentrations in both cathode and anode chambers (mM) in two-chamber experiments. Note that  $NO_2^-$  could be lost into the influent chamber across the AEM and therefore undercounted in this calculation.



NR stage energy consumption in cycle  $i$ :

NR stage energy consumption  $_{cycle i}$  (MJ/kg  $\text{NH}_3$ ) =

$$\frac{\int E_{cell} \times I dt}{([\text{NH}_3]_{\text{Syn, NR}i} - [\text{NH}_3]_{\text{Syn, NR}(i-1)}) \times V_{\text{Syn}} \times 17 \frac{g}{mol} \times \frac{1 kg}{1000 g}} \quad \text{Eqn. S12}$$

where  $E_{cell}$  is the full cell voltage during NR stage in cycle  $i$  (V),  $I$  is the total current in NR (A), and the electrical power ( $E_{cell} \times I$ ) was integrated over the entire NR duration (J),  $[\text{NH}_3]_{\text{Syn, NR}i}$  and  $[\text{NH}_3]_{\text{Syn, NR}(i-1)}$  are the  $\text{NH}_3$  concentrations in the  $\text{NH}_3$  synthesis chamber after NR in cycle  $i-1$  and cycle  $i$  (mM), respectively.

Average energy consumption for  $\text{NH}_3$  production in cycle  $i$ :

Average energy consumption  $_{\text{for } \text{NH}_3 \text{ production }_{cycle i}}$  (MJ/kg  $\text{NH}_3$ ) =

$$\frac{(\int E_{cell} \times I dt)_{EDi} + (\int E_{cell} \times I dt)_{NRi}}{([\text{NH}_3]_{\text{Rec, ED}i} - [\text{NH}_3]_{\text{Rec, ED}(i-1)}) \times V_{\text{Rec}} + ([\text{NH}_3]_{\text{Syn, NR}i} - [\text{NH}_3]_{\text{Syn, NR}(i-1)}) \times V_{\text{Syn}}} \times 17 \frac{g}{mol} \quad \text{Eqn. S13}$$

### Section S1.9 Nitrate concentrations used in typical fundamental research

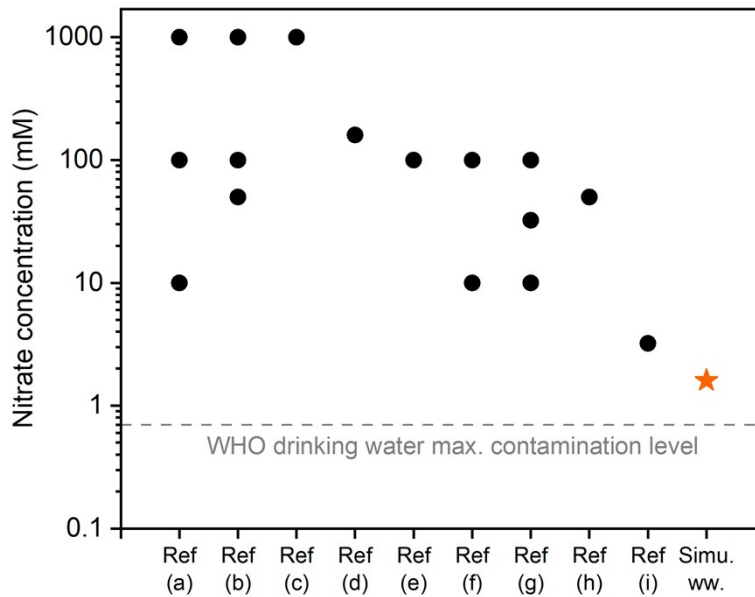

**Figure S7.  $\text{NO}_3^-$  concentrations used in typical fundamental research.** Dash line represents the maximum contamination level (MCL) for  $\text{NO}_3^-$  in drinking water set by the World Health Organization (10 ppm  $\text{NO}_3^-$ -N).<sup>2</sup> Ref (a): McEnaney et. al.<sup>3</sup>, Ref (b): Wu et. al.<sup>4</sup>, Ref (c): Gao et. al.<sup>5</sup>, Ref (d): Murphy et. al.<sup>6</sup>, Ref (e): Crawford et. al.<sup>7</sup>, Ref (f): Wang et. al.<sup>8</sup>, Ref (g): Chen et. al.<sup>9</sup>, Ref (h): Katsounaros et. al.<sup>10</sup>, Ref (i): Wang et. al.<sup>11</sup>. Plot was adapted using data from our previous work<sup>12</sup> with authors' permission.

## Section S2. Transference number calculations

We conducted back-of-the-envelope transference number calculations for influent chamber electrolyte in EDNR experiments to show the charge-carrying capabilities of different ions during ED using **Eqn. S14**.

$$t_j = \frac{i_j}{i} = \frac{|z_j|C_j\lambda_j}{\sum_k |z_k|C_k\lambda_k} \quad \text{Eqn. S14}$$

where  $i_j$  is the current carried by ionic species  $j$  (mA),  $i$  is the total current (mA),  $z_j$  is the charge of ionic species  $j$  (unitless),  $C_j$  is concentration of ionic species  $j$  (mM), and  $\lambda_j$  is the ionic conductivity of ionic species  $j$  ( $\text{S cm}^2 \text{mol}^{-1}$ ).

However, because the AEM and CEM were used between the influent and  $\text{NH}_3$  synthesis chambers and the influent and  $\text{NH}_3$  recovery chambers, respectively, we assumed complete blockage of counterions and calculated anion and cation transference numbers separately. It was assumed that ED current was carried solely by anion movement from  $\text{NH}_3$  synthesis to influent chambers, and solely by cation movement from influent to  $\text{NH}_3$  recovery chambers. All transference numbers calculated were based on the initial influent composition, and ionic conductivity data was from Zhong et al. [13]. Due to the near-neutral pH of all influents,  $\text{H}^+$  and

OH<sup>-</sup> are not included in transference number calculations due to their relatively low concentrations.

**Table S2.** Transference number calculations for simulated wastewater

| Anion transference number (influent to NH <sub>3</sub> synthesis chambers) |        |                    |                                                           |                     |                     |
|----------------------------------------------------------------------------|--------|--------------------|-----------------------------------------------------------|---------------------|---------------------|
| Ion                                                                        | Charge | Concentration (mM) | Ionic conductivity (S cm <sup>2</sup> mol <sup>-1</sup> ) | $ z_j C_j\lambda_j$ | Transference number |
| SO <sub>4</sub> <sup>2-</sup>                                              | -2     | 13.9               | 160                                                       | 4448                | 0.9750              |
| NO <sub>3</sub> <sup>-</sup>                                               | -1     | 1.6                | 71.42                                                     | 114.272             | 0.0250              |
| Total                                                                      |        |                    |                                                           | 4562.272            | 1                   |

| Cation transference number (influent to NH <sub>3</sub> recovery chambers) |        |                    |                                                           |                     |                     |
|----------------------------------------------------------------------------|--------|--------------------|-----------------------------------------------------------|---------------------|---------------------|
| Ion                                                                        | Charge | Concentration (mM) | Ionic conductivity (S cm <sup>2</sup> mol <sup>-1</sup> ) | $ z_j C_j\lambda_j$ | Transference number |
| NH <sub>4</sub> <sup>+</sup>                                               | +1     | 27.8               | 73.7                                                      | 2048.86             | 0.9457              |
| K <sup>+</sup>                                                             | +1     | 1.6                | 73.5                                                      | 117.6               | 0.0543              |
| Total                                                                      |        |                    |                                                           | 2166.46             | 1                   |

Note that the experimentally measured NH<sub>4</sub><sup>+</sup> ED current efficiency in ED1 is significantly lower than the calculated transference number, which we tentatively attribute to the CEM having a NH<sub>4</sub><sup>+</sup> to K<sup>+</sup> permselectivity ( $P_{K^+}^{NH_4^+}$ ) lower than 1. In contrast, the experimentally measured NO<sub>3</sub><sup>-</sup> ED current efficiency in ED1 is higher than the calculated transference number, possibly because the monovalent-selective AEM has a NO<sub>3</sub><sup>-</sup> to SO<sub>4</sub><sup>2-</sup> permselectivity ( $P_{SO_4^{2-}}^{NO_3^-}$ ) higher than 1. While membrane development is beyond the scope of this EDNR study, future work could directly calculate the permselectivities for several ion combinations of the membranes used along with other possible membranes.

**Table S3.** Transference number calculations for NO<sub>3</sub><sup>-</sup>-laden simulated wastewater

| Anion transference number (influent to NH <sub>3</sub> synthesis chambers) |  |  |  |  |  |
|----------------------------------------------------------------------------|--|--|--|--|--|
|----------------------------------------------------------------------------|--|--|--|--|--|

| Ion         | Charge | Concentration (mM) | Ionic conductivity (S cm <sup>2</sup> mol <sup>-1</sup> ) | $ z_j C_j\lambda_j$ | Transference number |
|-------------|--------|--------------------|-----------------------------------------------------------|---------------------|---------------------|
| $SO_4^{2-}$ | -2     | 13.9               | 160                                                       | 4448                | 0.6899              |
| $NO_3^-$    | -1     | 28                 | 71.42                                                     | 1999.76             | 0.3101              |
| Total       |        |                    |                                                           | 6447.76             | 1.0000              |

| Cation transference number (influent to NH <sub>3</sub> recovery chambers) |        |                    |                                                           |                     |                     |
|----------------------------------------------------------------------------|--------|--------------------|-----------------------------------------------------------|---------------------|---------------------|
| Ion                                                                        | Charge | Concentration (mM) | Ionic conductivity (S cm <sup>2</sup> mol <sup>-1</sup> ) | $ z_j C_j\lambda_j$ | Transference number |
| $NH_4^+$                                                                   | +1     | 27.8               | 73.7                                                      | 2048.86             | 0.4989              |
| $K^+$                                                                      | +1     | 28                 | 73.5                                                      | 2058                | 0.5011              |
| Total                                                                      |        |                    |                                                           | 4106.86             | 1.0000              |

**Table S4.** Transference number calculations for  $SO_4^{2-}$ -laden simulated wastewater

| Anion transference number (influent to NH <sub>3</sub> synthesis chambers) |        |                    |                                                           |                     |                     |
|----------------------------------------------------------------------------|--------|--------------------|-----------------------------------------------------------|---------------------|---------------------|
| Ion                                                                        | Charge | Concentration (mM) | Ionic conductivity (S cm <sup>2</sup> mol <sup>-1</sup> ) | $ z_j C_j\lambda_j$ | Transference number |
| $SO_4^{2-}$                                                                | -2     | 63.9               | 160                                                       | 20448               | 0.9944              |
| $NO_3^-$                                                                   | -1     | 1.6                | 71.42                                                     | 114.272             | 0.0056              |
| Total                                                                      |        |                    |                                                           | 20562.272           | 1.0000              |

| Cation transference number (influent to NH <sub>3</sub> recovery chambers) |        |                    |                                                           |                     |                     |
|----------------------------------------------------------------------------|--------|--------------------|-----------------------------------------------------------|---------------------|---------------------|
| Ion                                                                        | Charge | Concentration (mM) | Ionic conductivity (S cm <sup>2</sup> mol <sup>-1</sup> ) | $ z_j C_j\lambda_j$ | Transference number |
| $NH_4^+$                                                                   | +1     | 27.8               | 73.7                                                      | 2048.86             | 0.2855              |
| $K^+$                                                                      | +1     | 1.6                | 73.5                                                      | 117.6               | 0.0164              |
| $Na^+$                                                                     | +1     | 100                | 50.11                                                     | 5011                | 0.6982              |
| Total                                                                      |        |                    |                                                           | 7177.46             | 1.0000              |

**Table S5.** Transference number calculations for Cl<sup>-</sup>-laden simulated wastewater

| Anion transference number (influent to NH <sub>3</sub> synthesis chambers) |  |  |  |  |  |
|----------------------------------------------------------------------------|--|--|--|--|--|
|----------------------------------------------------------------------------|--|--|--|--|--|

| Ion         | Charge | Concentration (mM) | Ionic conductivity (S cm <sup>2</sup> mol <sup>-1</sup> ) | $ z_j C_j\lambda_j$ | Transference number |
|-------------|--------|--------------------|-----------------------------------------------------------|---------------------|---------------------|
| $SO_4^{2-}$ | -2     | 13.9               | 160                                                       | 4448                | 0.3648              |
| $NO_3^-$    | -1     | 1.6                | 71.42                                                     | 114.272             | 0.0094              |
| $Cl^-$      | -1     | 100                | 76.31                                                     | 7631                | 0.6258              |
| Total       |        |                    |                                                           | 12193.272           | 1.0000              |

| Cation transference number (influent to NH <sub>3</sub> recovery chambers) |        |                    |                                                           |                     |                     |
|----------------------------------------------------------------------------|--------|--------------------|-----------------------------------------------------------|---------------------|---------------------|
| Ion                                                                        | Charge | Concentration (mM) | Ionic conductivity (S cm <sup>2</sup> mol <sup>-1</sup> ) | $ z_j C_j\lambda_j$ | Transference number |
| $NH_4^+$                                                                   | +1     | 27.8               | 73.7                                                      | 2048.86             | 0.2855              |
| $K^+$                                                                      | +1     | 1.6                | 73.5                                                      | 117.6               | 0.0164              |
| $Na^+$                                                                     | +1     | 100                | 50.11                                                     | 5011                | 0.6982              |
| Total                                                                      |        |                    |                                                           | 7177.46             | 1.0000              |

## Section S3. Supplementary results

### Section S3.1 Proof-of-concept EDNR

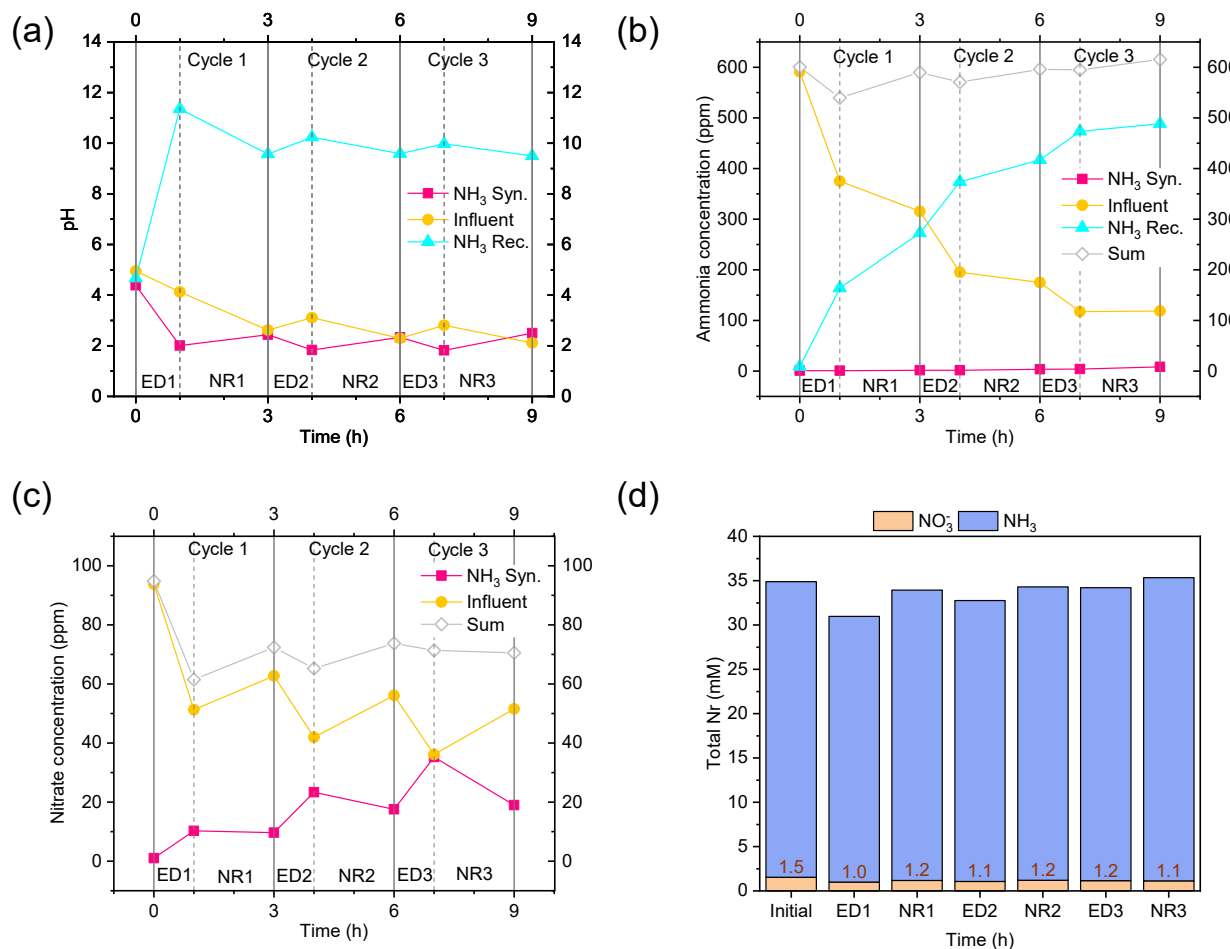

**Figure S8. Proof-of-concept experiment.** (a) pH trend, (b) NH<sub>3</sub> concentration trend and (c) NO<sub>3</sub><sup>-</sup> concentration trend. EDNR cycles are indicated by solid vertical lines and stages are indicated by dashed vertical lines. Sum in (b) is the sum of NH<sub>3</sub> concentrations in all three chambers, and sum in (c) is the sum of NO<sub>3</sub><sup>-</sup> concentrations in NH<sub>3</sub> synthesis and influent chambers. (d) Total N<sub>r</sub> balance in the EDNR system (i.e., all three chambers and their corresponding electrolyte reservoirs).

## Section S3.2 Engineering of EDNR operating parameters

### Section S3.2.1 Reaction environment effects on nitrate reduction reaction

To amplify effects of NO<sub>3</sub>RR electrolyte compositions, we fixed the NO<sub>3</sub><sup>-</sup> concentration at 10 mM, slightly higher than typical EDNR influent levels. An applied potential of -0.8 V vs. RHE was found to balance NR activity and NR selectivity on Ti under similar NO<sub>3</sub><sup>-</sup> concentrations in previous reports,<sup>12</sup> and thus was used in all subsequent experiments.

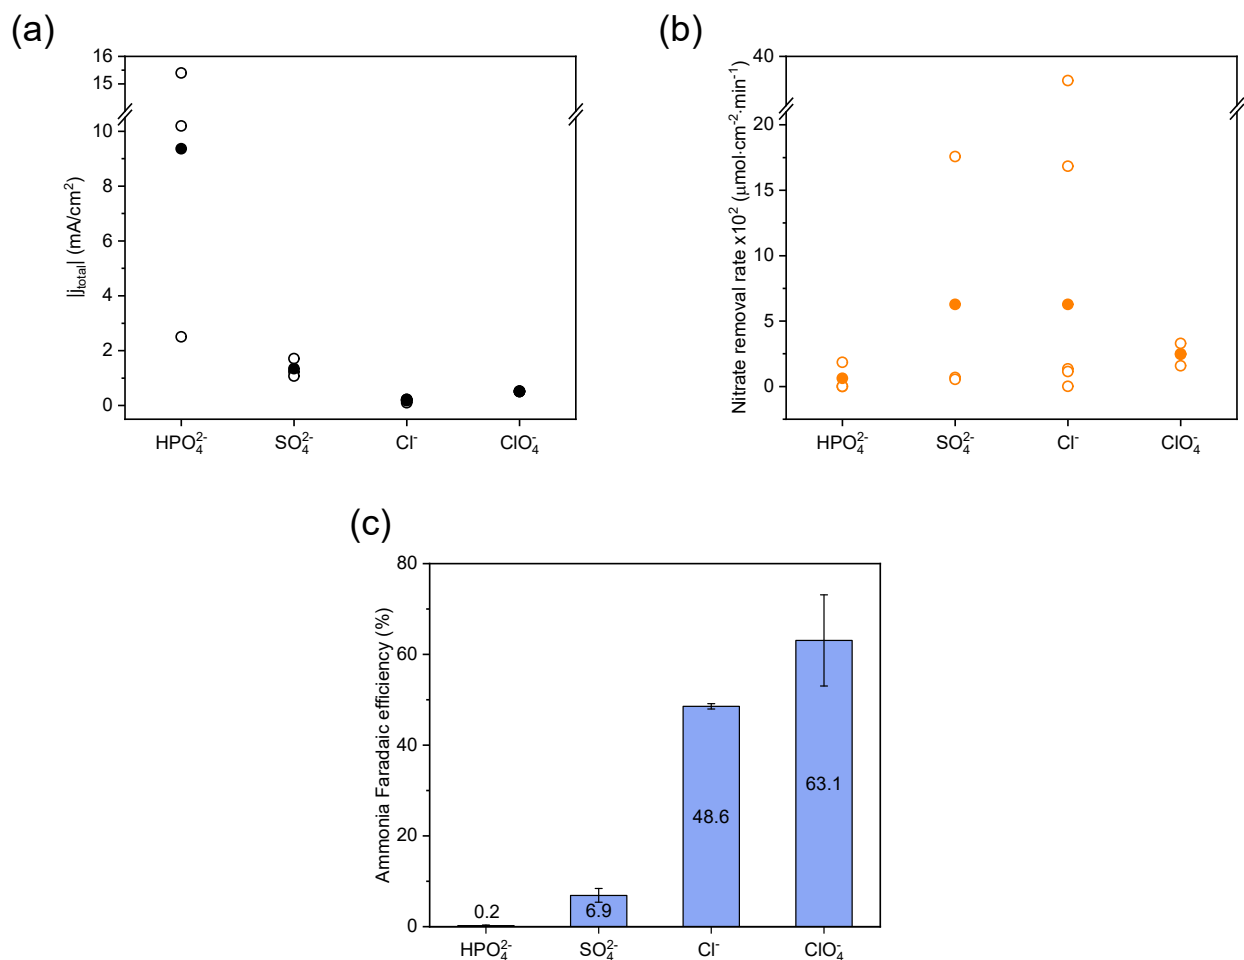

**Figure S9. Anion effects on nitrate reduction reaction.** (a) Total current density. (b) Time-averaged NO<sub>3</sub><sup>-</sup> removal rate. Unfilled symbols in (a) and (b) represent results from individual replicate experiments, and filled symbols represent the average value in this background electrolyte. (c) NH<sub>3</sub> Faradaic efficiency from two-chamber experiments. Error bars represent  $\pm$  one standard deviation. Background electrolytes: 10 mL 0.5 M Na<sub>2</sub>HPO<sub>4</sub>, or 0.5 M Na<sub>2</sub>SO<sub>4</sub>, or 1 M NaCl or 1 M NaClO<sub>4</sub>, pH adjusted to 1.72 with 2 M HClO<sub>4</sub>,

and 10 mM NaNO<sub>3</sub> was added to the cathode chamber. Applied potential: -0.8 V vs. RHE. Reaction duration: 30 min.

While a very high total current density was observed in the HPO<sub>4</sub><sup>2-</sup> background (**Fig. S9a**), HER likely dominated, and only minimal NO<sub>3</sub><sup>-</sup> was reduced (**Fig. S9b**). This dominant HER likely originated from facile proton donation from phosphate species, consistent with previous reports.<sup>14-16</sup> SO<sub>4</sub><sup>2-</sup> and Cl<sup>-</sup> backgrounds exhibited high-variance NO<sub>3</sub>RR activity, possibly due to competitive adsorption on a variety of facets of the polycrystalline Ti electrode.<sup>17</sup> The most weakly adsorbing ClO<sub>4</sub><sup>-</sup> background generated moderate but lower-variance total current density and NO<sub>3</sub><sup>-</sup> removal rate. FE<sub>NH<sub>3</sub></sub> was highest in the ClO<sub>4</sub><sup>-</sup> background (63.1±10.1%), suppressed slightly in Cl<sup>-</sup> (48.6±0.6%), and almost negligible in SO<sub>4</sub><sup>2-</sup> and HPO<sub>4</sub><sup>2-</sup> (<7%) (**Fig. S9c**). We have shown in a previous study that hydrogen evolution reaction (HER) and Ti hydride formation compete with electrochemical nitrate reduction on Ti foil.<sup>18</sup> Within nitrate reduction, NH<sub>3</sub> and NO<sub>2</sub><sup>-</sup> account for >72% nitrogen products under similar reaction conditions (-0.8 V vs. RHE, 10 mM NO<sub>3</sub><sup>-</sup>, pH 1.7).<sup>12</sup> Thus, the remaining FE most likely went into HER and Ti hydride formation.



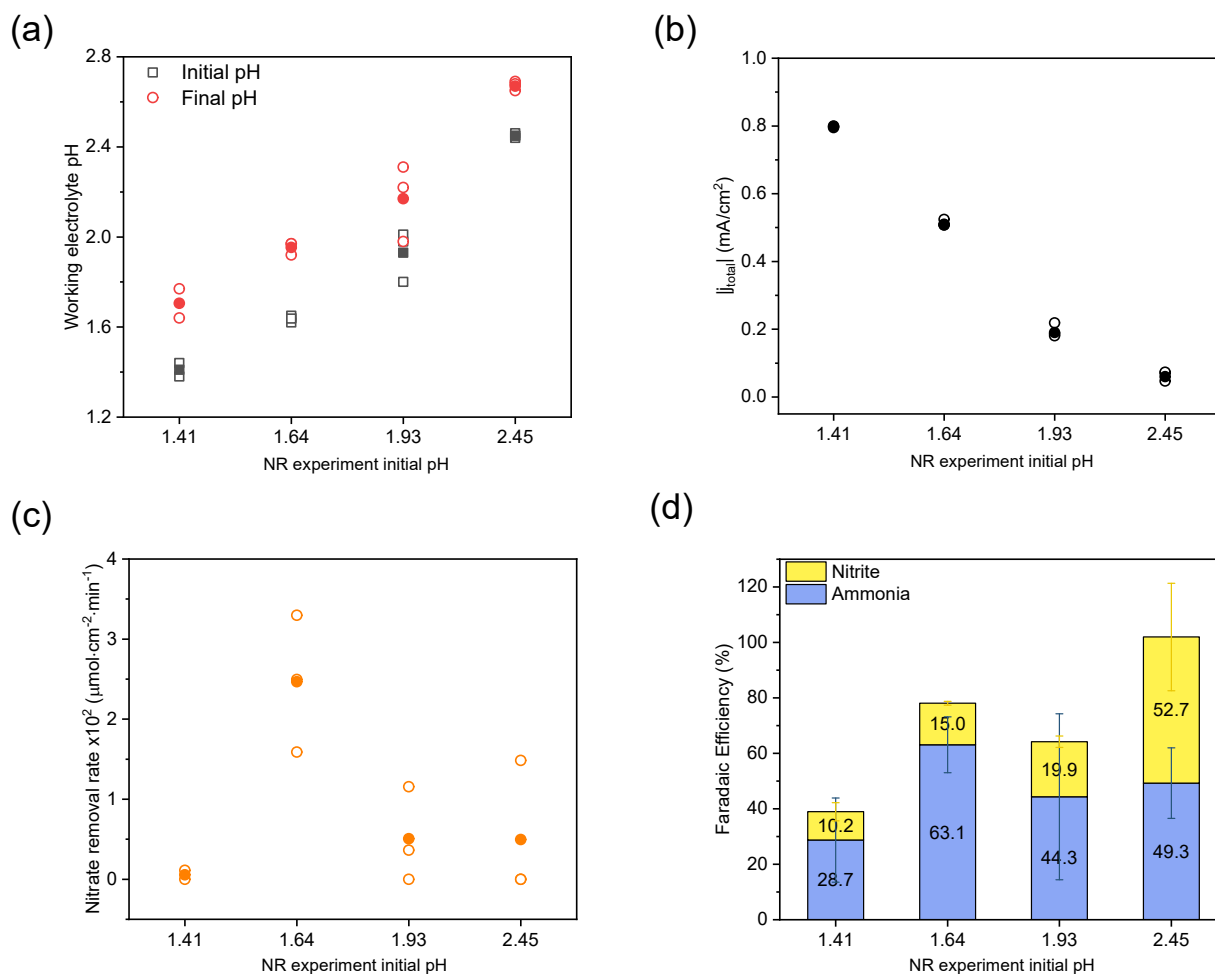

**Figure S10. pH effects on nitrate reduction reaction.** (a) Initial and final pH in the working electrode chamber. (b) Total current density. (c) Time-averaged  $\text{NO}_3^-$  removal rate. Unfilled symbols in (a)–(c) represent results from individual replicate experiments, and filled symbols represent the average value. (d) Faradaic efficiency from two-chamber experiments. Error bars represent  $\pm$  one standard deviation. The higher than unity sum FE of  $\text{NH}_3$  and nitrite in pH 2.45 reflects accumulated product analysis errors that originated from the very low total charge passed in NR. Electrolytes: 10 mL 1 M  $\text{NaClO}_4$ , pH adjusted to 1.41, 1.64, 1.93, and 2.45 with 2 M  $\text{HClO}_4$ , and 10 mM  $\text{NaNO}_3$  was added to the cathode chamber. Applied potential:  $-0.8$  V vs. RHE. Reaction duration: 30 min.

Within the pH range explored, the working electrode chamber pH generally increased by  $<0.2$  units after reaction (Fig. S10a). The total current density decreased monotonically with increasing initial pH (Fig. S10b), but the highest  $\text{NO}_3^-$  removal rate was observed at pH 1.64 (Fig. S10c). Below pH 1.64, significantly lower nitrate reduction FE ( $<40\%$ ) was attributed to severe

HER and/or Ti hydride formation; above pH 1.64,  $FE_{\text{NH}_3}$  was impaired while  $FE_{\text{NO}_2^-}$  was enhanced (Fig. S10d).

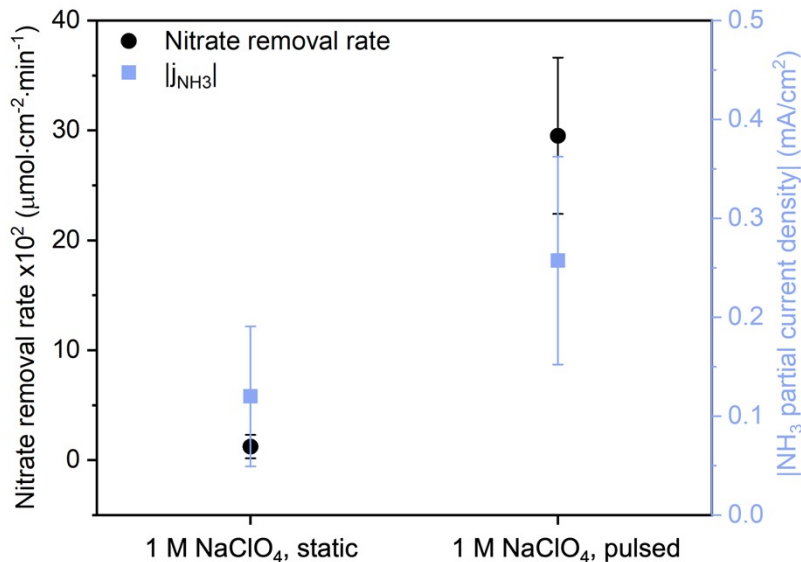

**Figure S11. Applied potential profile effects on nitrate reduction reaction.** Comparison of time-averaged  $\text{NO}_3^-$  removal rate (black circles, left axis) and  $\text{NH}_3$  partial current density (purple squares, right y-axis) in static and pulsed potential experiments. Electrolyte for both chambers: 10 mL 1 M NaClO<sub>4</sub> + 10 mM HNO<sub>3</sub>. Static potential:  $-1.0$  V vs. RHE, 30 min. Pulsed potential:  $E_{\text{WE}} = -1.0$  V vs. RHE for 10 s, followed by  $E_{\text{WE}} = \text{OCV} - 300$  mV for 10 s, total reaction duration of 60 min (i.e., effective reduction time of 30 min). Error bars represent  $\pm$  one standard deviation.

**Section S3.2.2 Implementation of NR environment engineering to EDNR**

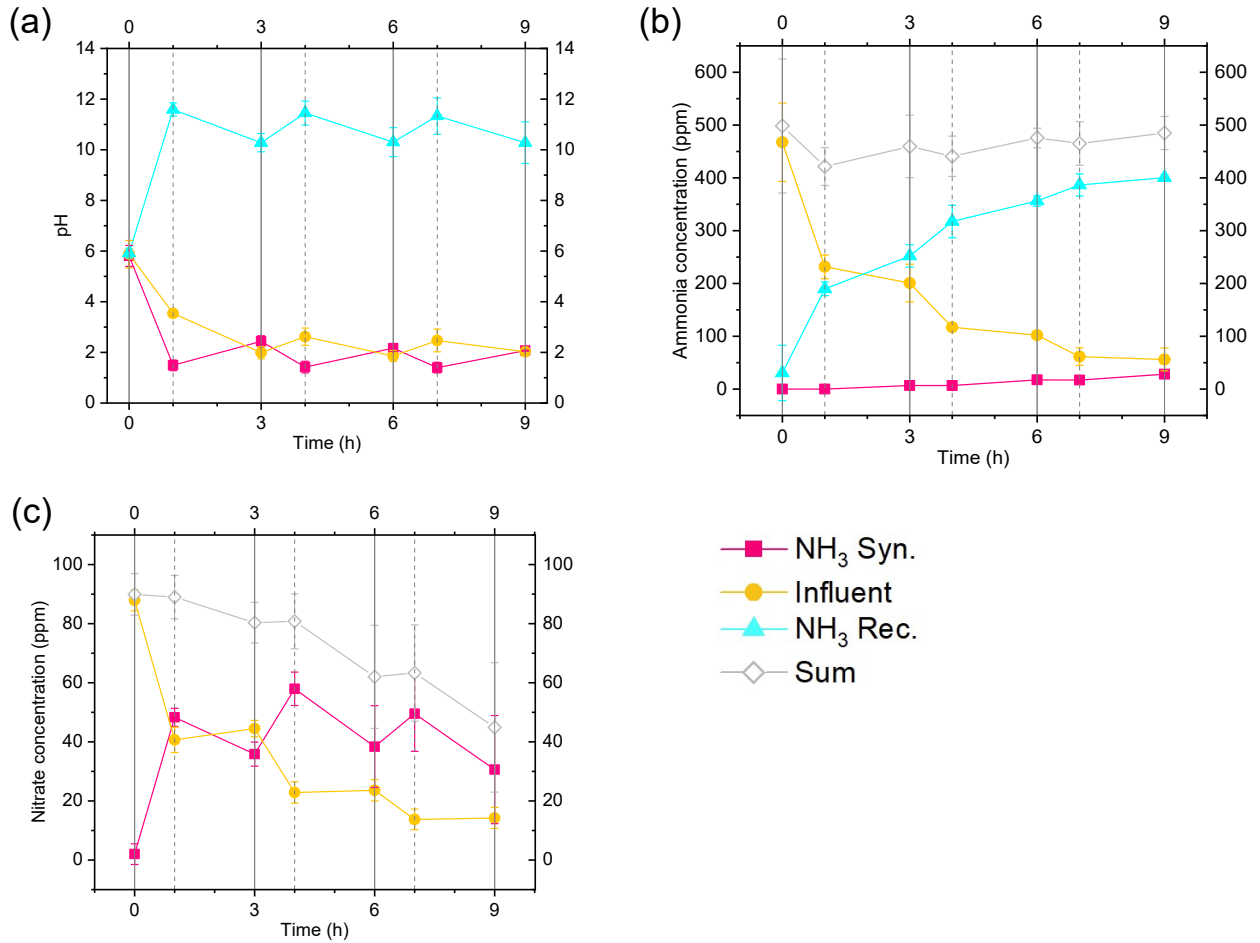

**Figure S12. Optimized NR experiment trends. (a) pH trend, (b) NH<sub>3</sub> concentration trend and (c) NO<sub>3</sub><sup>-</sup> concentration trend. EDNR cycles are indicated by solid vertical lines and stages are indicated by dash vertical lines. Same legends apply to all figures. Sum in (b) is the sum of NH<sub>3</sub> concentrations in all three chambers, and sum in (c) is the sum of NO<sub>3</sub><sup>-</sup> concentrations in NH<sub>3</sub> synthesis and influent chambers. Error bars represent ± one standard deviation.**

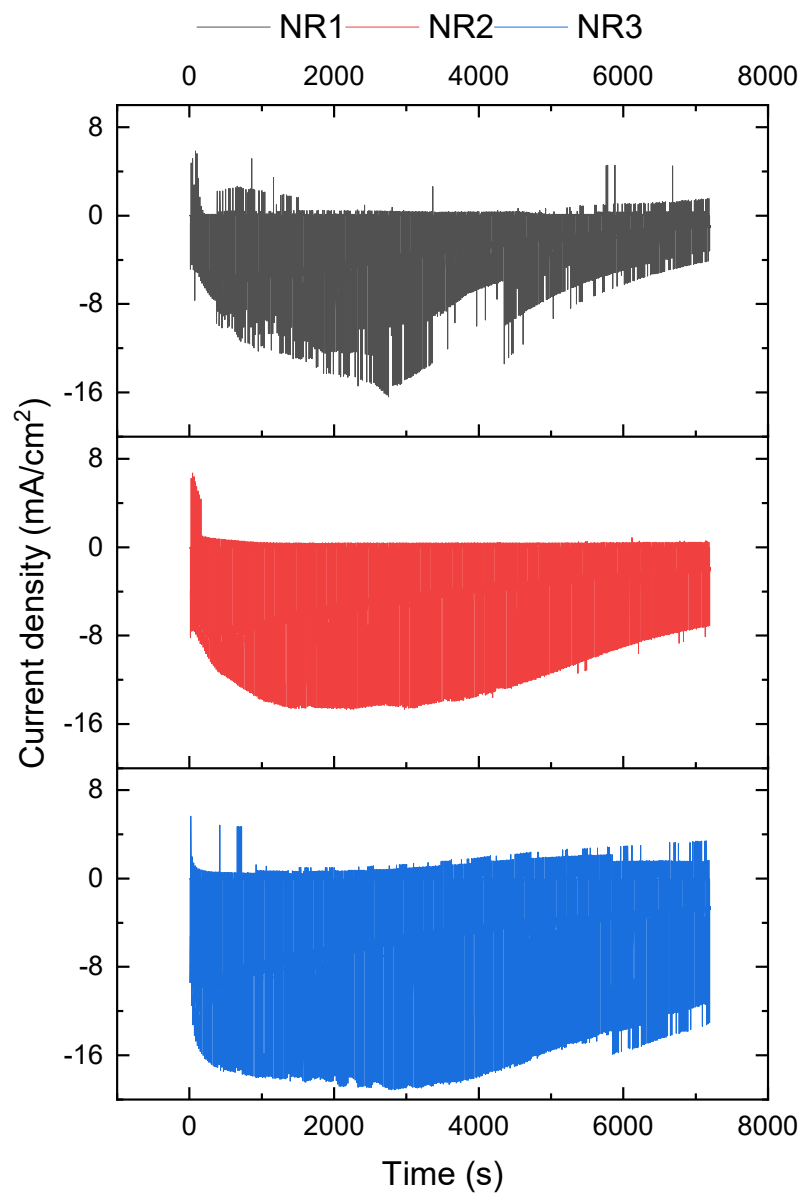

**Figure S13. NR stage chronoamperometry from a representative optimized NR experiment.**

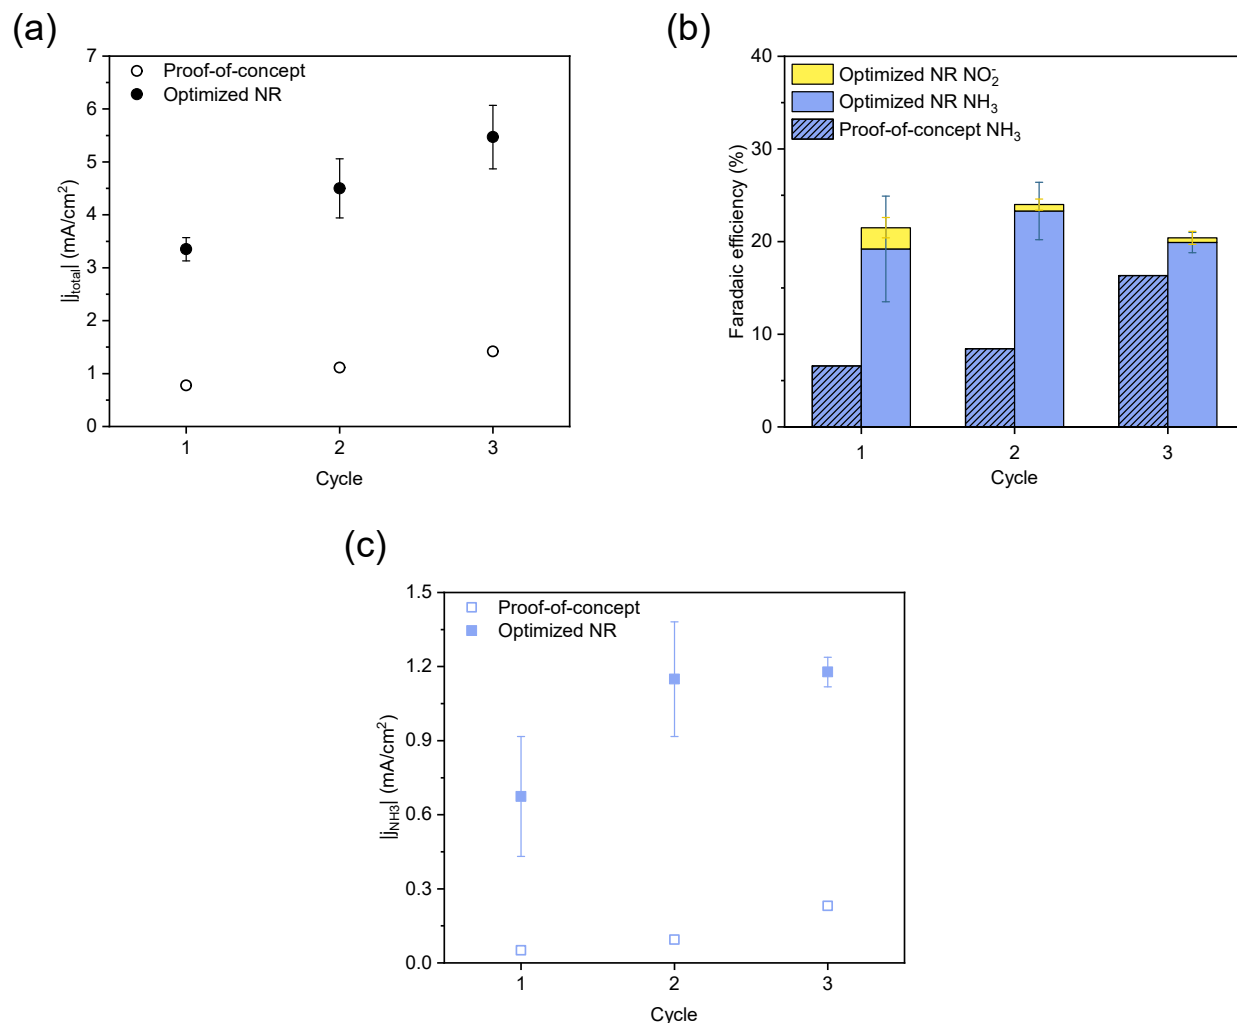

**Figure S14. Optimized NR experiment NR performance.** Comparison of **(a)** absolute value of total current density, **(b)** Faradaic efficiency and **(c)** absolute value of NH<sub>3</sub> partial current density in NR stages in proof-of-concept and optimized NR experiments. Error bars represent  $\pm$  one standard deviation for triplicate optimized NR experiments (proof of concept n=1). The total current density during NR increased with cycle number, likely due to increased surface roughness over time.

NH<sub>4</sub><sup>+</sup> and NO<sub>3</sub><sup>-</sup> ED fluxes were proportional to their current efficiency (**Eqn. S3** and **Eqn. S6**) and showed the same trend with respect to cycle number, which aligns with the decreasing trends of influent chamber NH<sub>4</sub><sup>+</sup> and NO<sub>3</sub><sup>-</sup> concentrations (**Fig. S12**, **Fig. S15–16**). Because the amount of NH<sub>4</sub><sup>+</sup> and NO<sub>3</sub><sup>-</sup> migrated during ED were a few times below the ion exchange capacities of the CEM<sup>19</sup> and AEM<sup>20</sup>, respectively, and the applied current was three orders of magnitude lower than the theoretical limiting current predicted by the Rosenberg-Tirrell equation,<sup>21</sup> transport

from influent to the CEM/AEM (rather than transport across the CEM/AEM) likely controlled  $\text{Nr}$  removal from the influent.

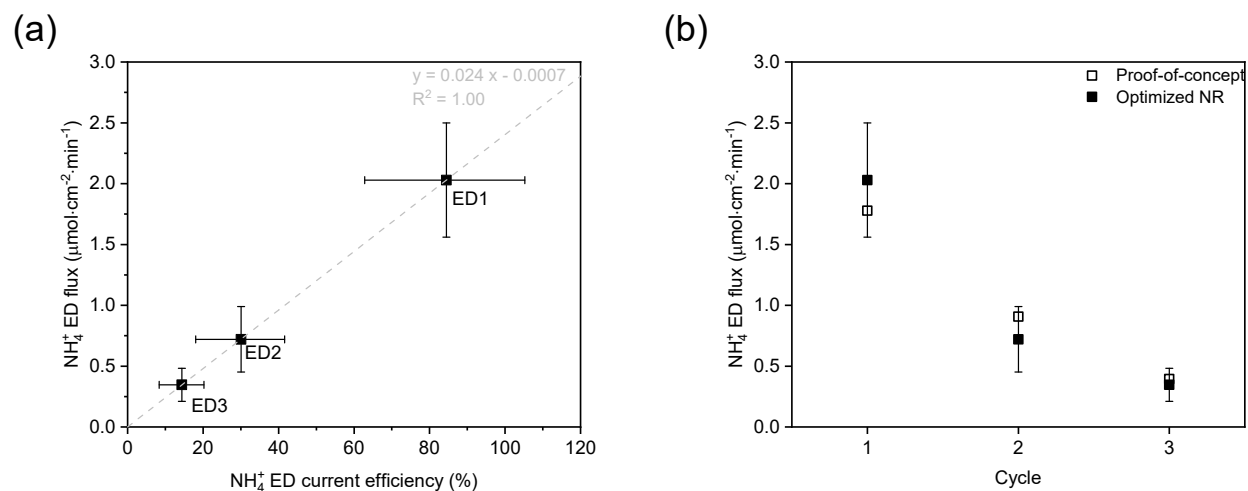

**Figure S15. Optimized NR experiment ED performance for  $\text{NH}_4^+$ .** (a) Relation between  $\text{NH}_4^+$  ED flux and  $\text{NH}_4^+$  ED current efficiency, as predicted by Eqn. S3. (b)  $\text{NH}_4^+$  ED flux as a function of cycle number, in comparison with proof-of-concept experiments. Error bars represent  $\pm$  one standard deviation for triplicate optimized NR experiments (proof of concept n=1).

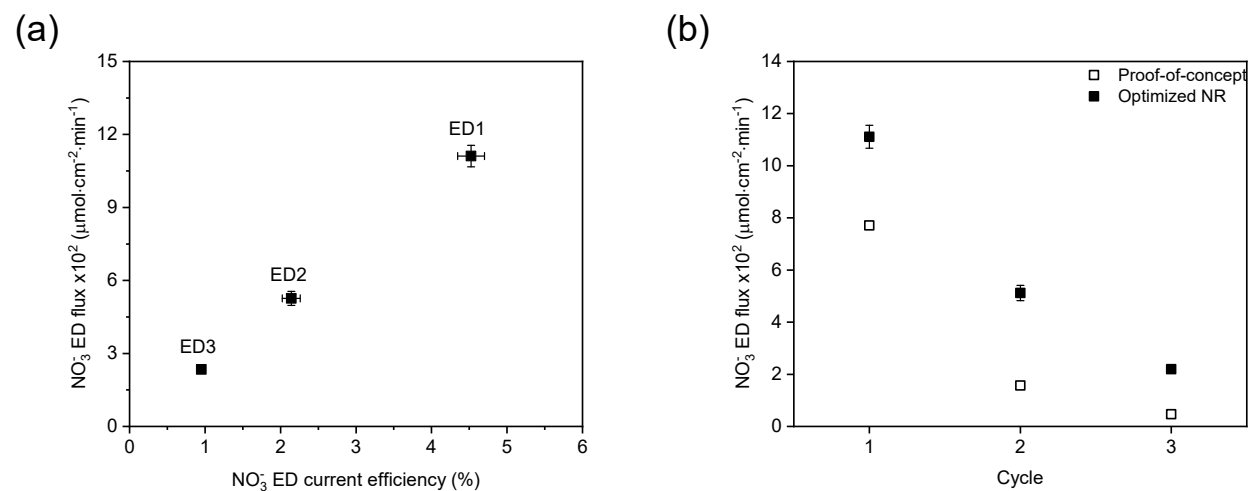

**Figure S16. Optimized NR experiment ED performance for  $\text{NO}_3^-$ .** (a) Relation between  $\text{NO}_3^-$  ED flux and  $\text{NO}_3^-$  ED current efficiency, as predicted by Eqn. S6. (b)  $\text{NO}_3^-$  ED flux as a function of cycle number, in comparison with proof-of-concept experiments. Error bars represent  $\pm$  one standard deviation for triplicate optimized NR experiments (proof of concept n=1).

### Section S3.2.3 Influence of ED stage operating parameters

First, we found that reducing the ED duration inhibited  $\text{NH}_3$  recovery and  $\text{NO}_3^-$  removal from the influent. By halving the durations in ED2 and ED3 (referred to as short ED experiments),  $\text{NH}_4^+$  ED current efficiency was not statistically different from optimized NR (**Fig. S18a**), but the end-of-run  $\eta_{\text{Recovery}}$  dropped from  $0.84 \pm 0.10$  to  $0.66 \pm 0.02$  due to reduced total ED charge (**Fig. S18c**).  $\text{NO}_3^-$  ED current efficiency was only slightly improved in short ED, but the end-of-run influent  $\text{NO}_3^-$  removal decreased slightly from  $84 \pm 4\%$  to  $73 \pm 7\%$  (**Fig. S18b**). Despite having similar  $\text{NO}_3^-$  concentrations at the beginning of NR stages with optimized NR (**Fig. S19a**), short ED exhibited dramatically lower  $\eta_{\text{Synthesis}}$ , which dropped from  $1.11 \pm 0.12$  to  $0.36 \pm 0.28$  at the end of the run (**Fig. S19f**). We attributed this inferior NR performance to higher initial bulk pH in the  $\text{NH}_3$  synthesis chamber ( $\sim 0.5$  units higher than in optimized NR, **Fig. S19b**). The insufficient acidity led to substantially lowered NR activity and  $\text{FE}_{\text{NH}_3}^{\text{E}}$  (approximately half of values in optimized NR, **Fig. S19c-e**), highlighting the sensitivity of NR performance to the electrolyte pH.

We kept the short ED durations but enhanced mass transport in ED by increasing the electrolyte flow rate from 30 to 100 mL/min (in all chambers), the same as the flow rate used in NR stages (referred to as short ED + high flow rate experiments). However, ED current efficiencies for  $\text{NH}_4^+$  and  $\text{NO}_3^-$  were not appreciably improved, and influent  $\text{NO}_3^-$  removal remained similar to Short ED. The largely unaltered  $\text{NO}_3^-$  removal indicates that the  $\text{NO}_3^-$  transport from the influent chamber to the AEM/CEM might be controlled by electromigration rather than diffusion and convection under this condition. In contrast,  $\eta_{\text{Recovery}}$  was enhanced by 25%–35% in all cycles relative to short ED, restoring the values observed in the optimized NR case (**Fig. S18c**). The enhanced  $\text{NH}_3$  recovery suggested  $\text{NH}_3$  transport from the CEM to the  $\text{NH}_3$  recovery chamber was also sluggish under this condition and was facilitated by the enhanced mass transport. Compared to short ED, similar  $\text{NH}_3$  synthesis chamber pH and  $\text{NO}_3^-$  concentrations were achieved at the beginning of each NR stage (**Fig. S19a–b**), and  $\eta_{\text{Synthesis}}$  was not statistically improved as a result (**Fig. S19f**).

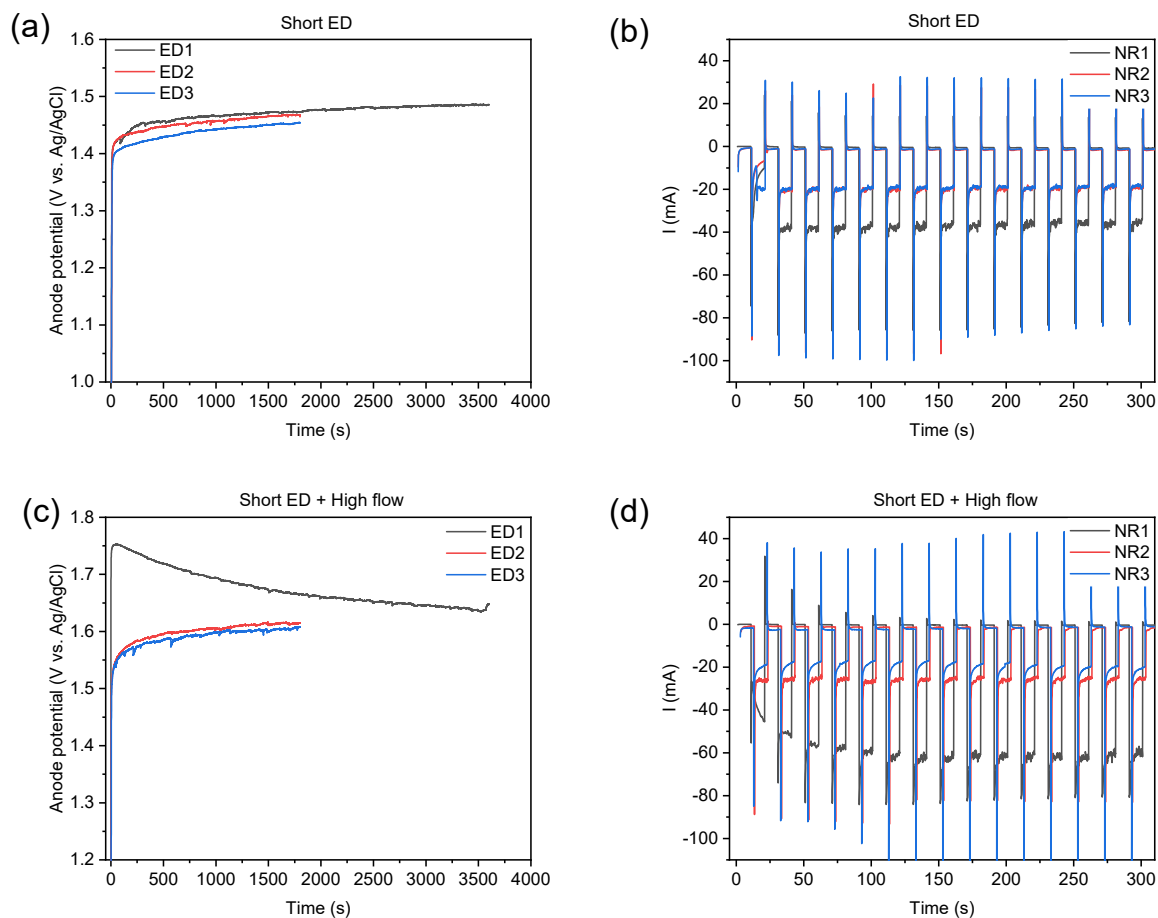

**Figure S17. Chronopotentiometry and chronoamperometry data from ED operating parameters study.** (a) Anode ( $\text{IrO}_2\text{-Ta}_2\text{O}_5/\text{Ti}$  mesh electrode in the  $\text{NH}_3$  synthesis chamber) potentials as functions of time in ED stages and (b) cathode (Ti electrode in the  $\text{NH}_3$  synthesis chamber) current in the first 5 min into each NR stage in the short ED experiments. (c) Anode ( $\text{IrO}_2\text{-Ta}_2\text{O}_5/\text{Ti}$  mesh electrode in the  $\text{NH}_3$  synthesis chamber) potentials as functions of time in ED stages and (d) cathode (Ti electrode in the  $\text{NH}_3$  synthesis chamber) current in the first 5 min into each NR stage in the short ED + high flow experiments. The average total current density from NR stages in both sets of experiments are given in **Fig. S19c**.



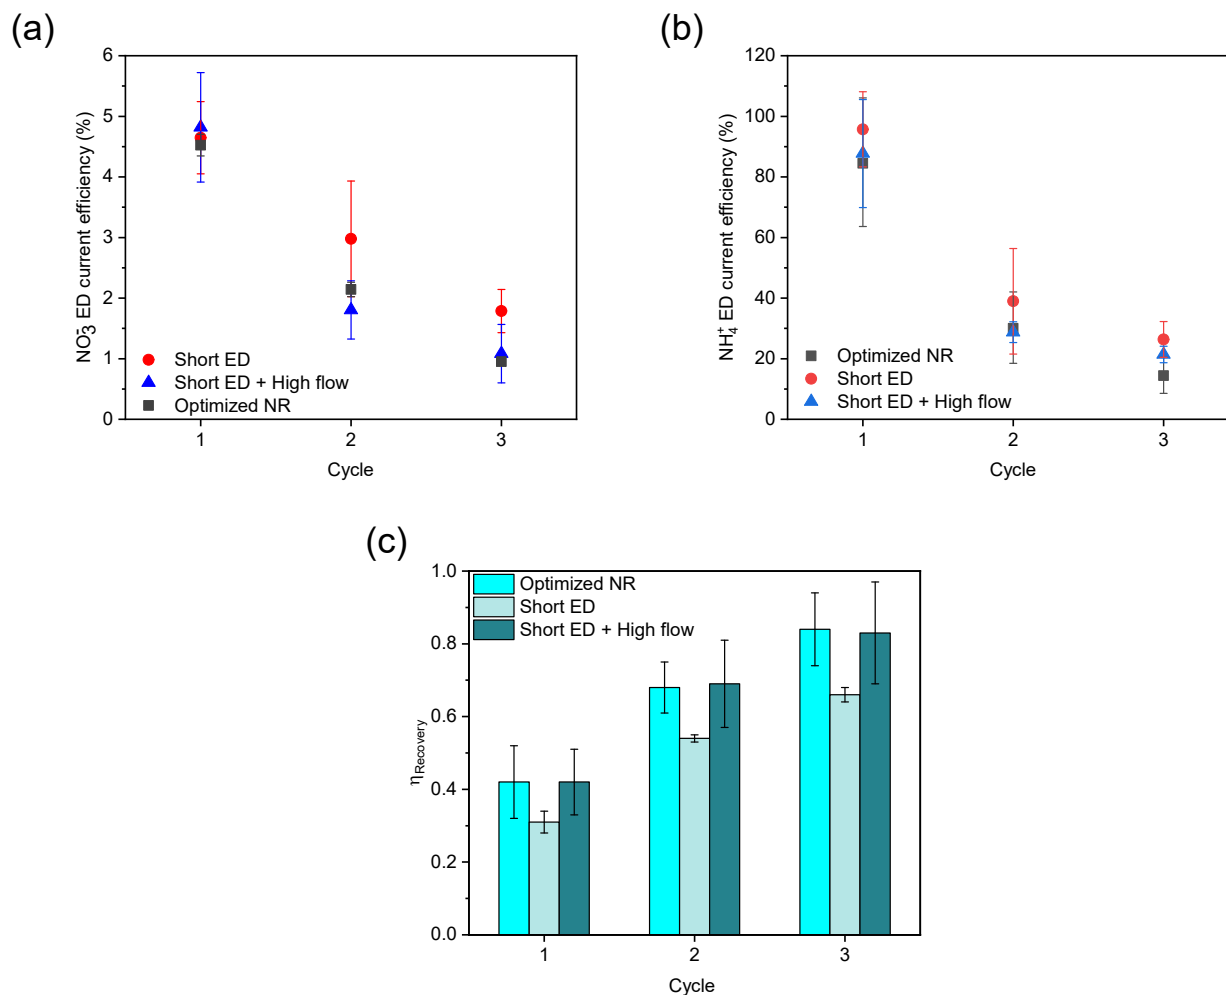

**Figure S18. ED operating parameters effects on ED. (a)  $\text{NH}_4^+$ , (b)  $\text{NO}_3^-$  ED current efficiencies and (c)  $\text{NH}_3$  recovery efficiency, in comparison with optimized NR experiments. Error bars represent  $\pm$  one standard deviation.**

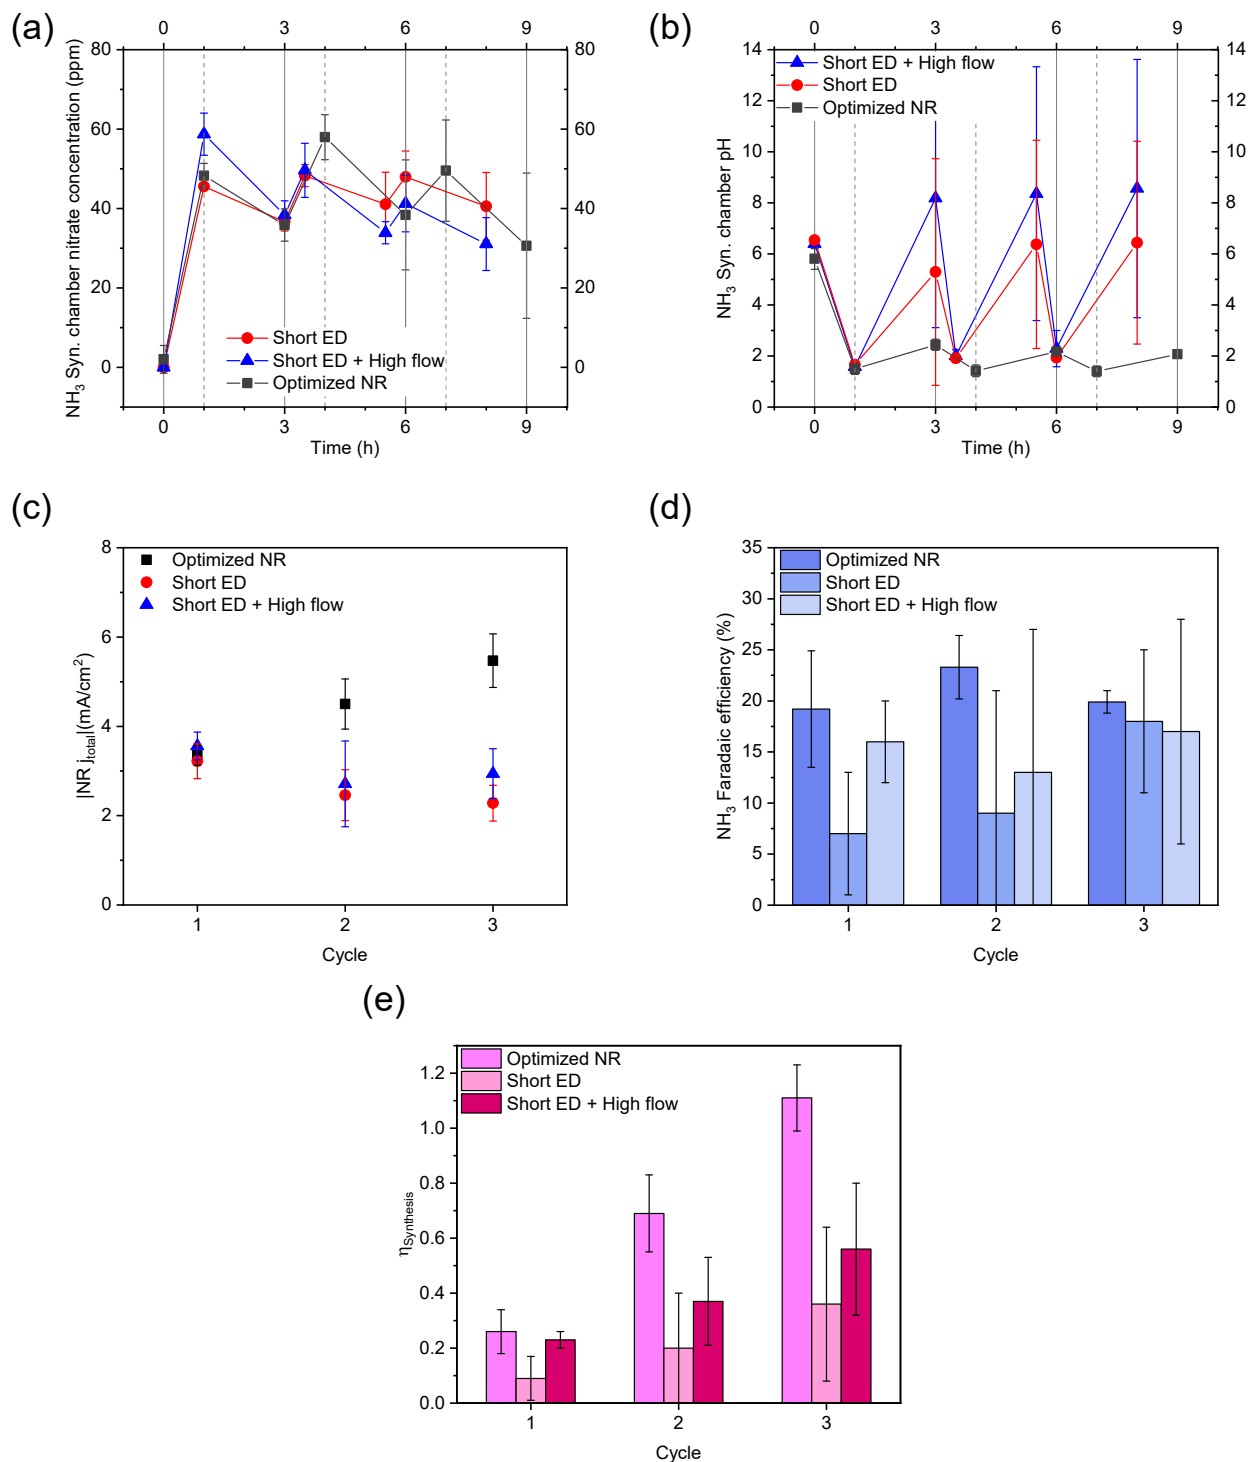

**Figure S19. ED operating parameters effects on NR. (a)**  $\text{NH}_3$  synthesis chamber pH trend and **(b)**  $\text{NH}_3$  synthesis chamber  $\text{NO}_3^-$  concentration trend, **(c)** absolute value of total current density and **(d)**  $\text{NH}_3$  Faradaic efficiency in NR stages, and **(e)**  $\text{NH}_3$  synthesis efficiency compared to optimized NR experiments. Error bars represent  $\pm$  one standard deviation.

## Section S3.3 Impacts of influent compositions on EDNR performance

### Section S3.3.1 Modified simulated wastewater

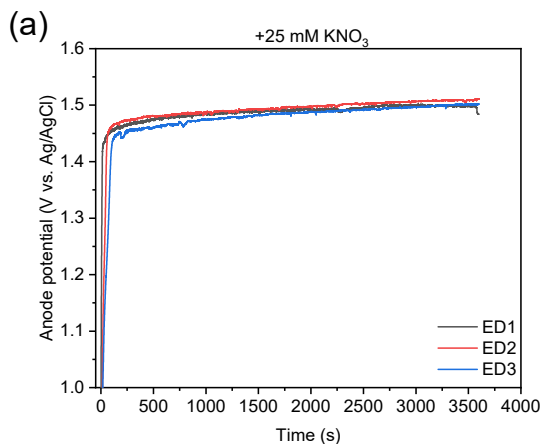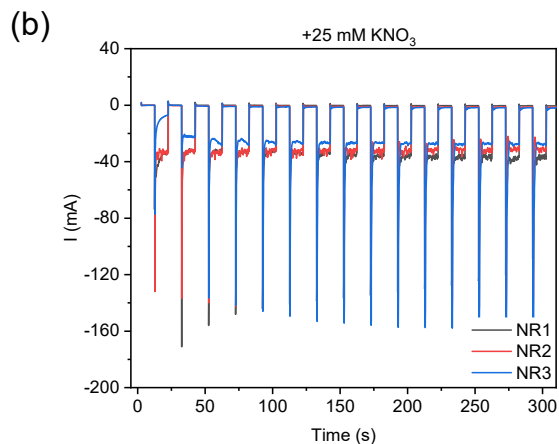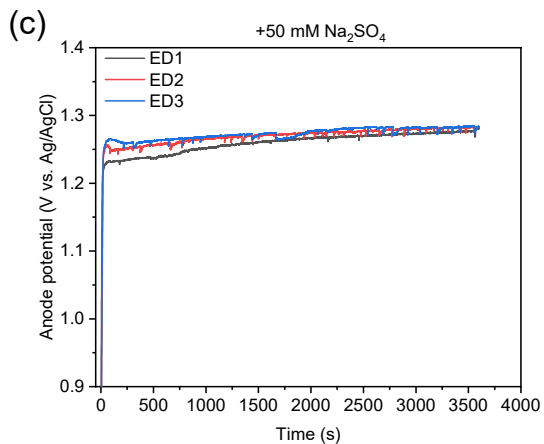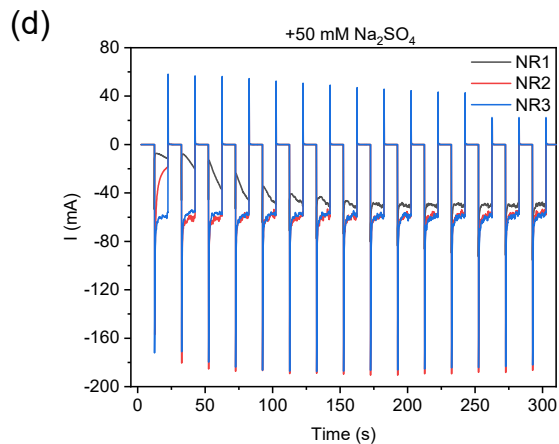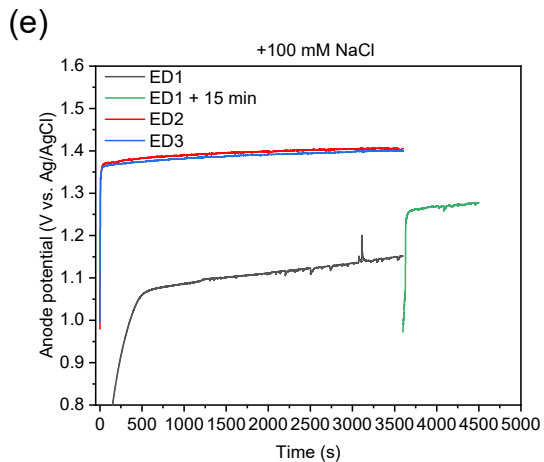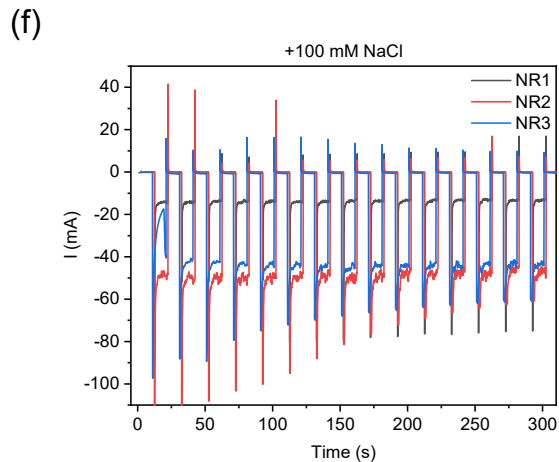

**Figure S20. Chronopotentiometry and chronoamperometry data from EDNR experiments using different modified simulated wastewaters. (a)** Anode (IrO<sub>2</sub>-Ta<sub>2</sub>O<sub>5</sub>/Ti mesh electrode in the NH<sub>3</sub> synthesis chamber) potentials as functions of time in ED stages and **(b)** cathode (Ti electrode in the NH<sub>3</sub> synthesis chamber) current in the first 5 min into each NR stage in the EDNR experiment using NO<sub>3</sub><sup>-</sup>-laden simulated wastewater. **(c)** Anode (IrO<sub>2</sub>-Ta<sub>2</sub>O<sub>5</sub>/Ti mesh electrode in the NH<sub>3</sub> synthesis chamber) potentials as functions of time in ED stages and **(d)** cathode (Ti electrode in the NH<sub>3</sub> synthesis chamber) current in the first 5 min into each NR stage in the EDNR experiment using SO<sub>4</sub><sup>2-</sup>-laden simulated wastewater. **(e)** Anode (IrO<sub>2</sub>-Ta<sub>2</sub>O<sub>5</sub>/Ti mesh electrode in the NH<sub>3</sub> synthesis chamber) potentials as functions of time in ED stages and **(f)** cathode (Ti electrode in the NH<sub>3</sub> synthesis chamber) current in the first 5 min into each NR stage in the EDNR experiment using Cl<sup>-</sup>-laden simulated wastewater. The average total current density from NR stages in all sets of experiments are given in **Fig. S21c**.

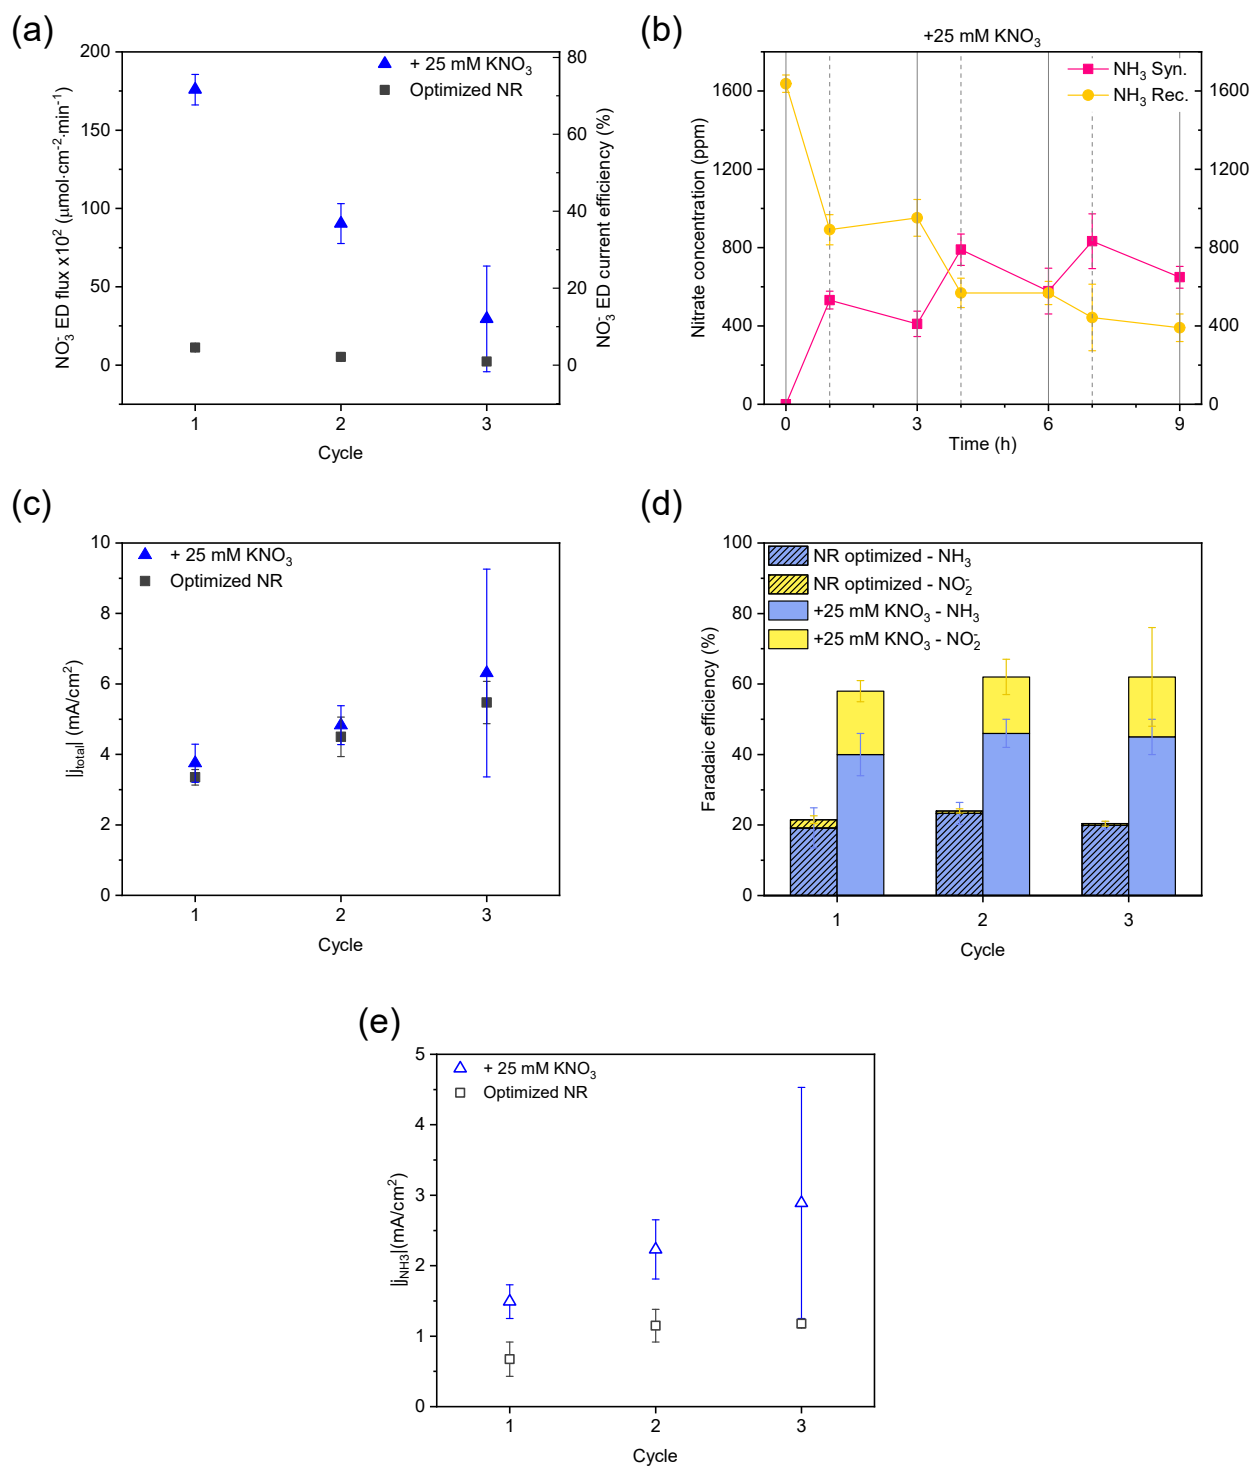

**Figure S21.**  $\text{NO}_3^-$ -laden simulated wastewater EDNR. **(a)**  $\text{NO}_3^-$  ED flux (left y-axis) and  $\text{NO}_3^-$  ED current efficiency (right y-axis), **(b)**  $\text{NO}_3^-$  concentration trend (EDNR cycles are indicated by solid vertical lines and stages are indicated by dash vertical lines), **(c)** absolute value of total current density in NR stages, **(d)**

Faradaic efficiency in NR stages, and (e) absolute value of  $\text{NH}_3$  partial current density in NR stages using  $\text{NO}_3^-$ -laden simulated wastewater (+25 mM  $\text{KNO}_3$ ): 13.9 mM  $(\text{NH}_4)_2\text{SO}_4$  + 26.4 mM  $\text{KNO}_3$ , in comparison with baseline simulated wastewater (optimized NR) experiments. Error bars represent  $\pm$  one standard deviation.

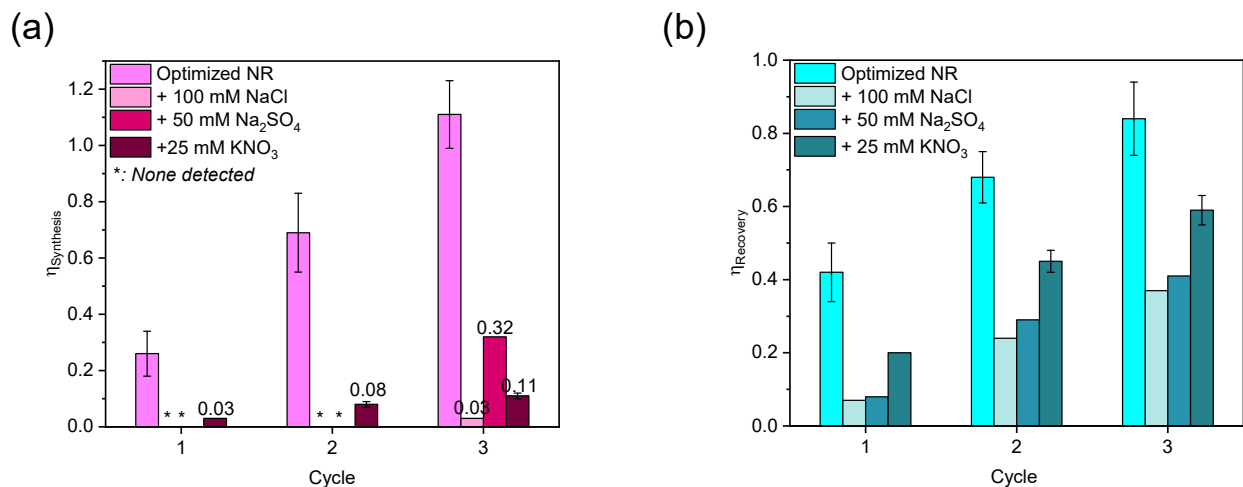

**Figure S22. All influent effects.** (a)  $\text{NH}_3$  synthesis efficiency and (b)  $\text{NH}_3$  recovery efficiency as functions of cycle number in EDNR experiments with a variety of influent conditions. Influent conditions for the different scenarios are as follows. Baseline simulated wastewater (optimized NR): 13.9 mM  $(\text{NH}_4)_2\text{SO}_4$  + 1.6 mM  $\text{KNO}_3$ .  $\text{Cl}^-$ -laden (+100 mM NaCl): 13.9 mM  $(\text{NH}_4)_2\text{SO}_4$  + 1.6 mM  $\text{KNO}_3$  + 100 mM NaCl.  $\text{SO}_4^{2-}$ -laden (+50 mM  $\text{Na}_2\text{SO}_4$ ): 13.9 mM  $(\text{NH}_4)_2\text{SO}_4$  + 1.6 mM  $\text{KNO}_3$  + 50 mM  $\text{Na}_2\text{SO}_4$ .  $\text{NO}_3^-$ -laden (+25 mM  $\text{KNO}_3$ ): 13.9 mM  $(\text{NH}_4)_2\text{SO}_4$  + 26.4 mM  $\text{KNO}_3$ . Error bars represent  $\pm$  one standard deviation.

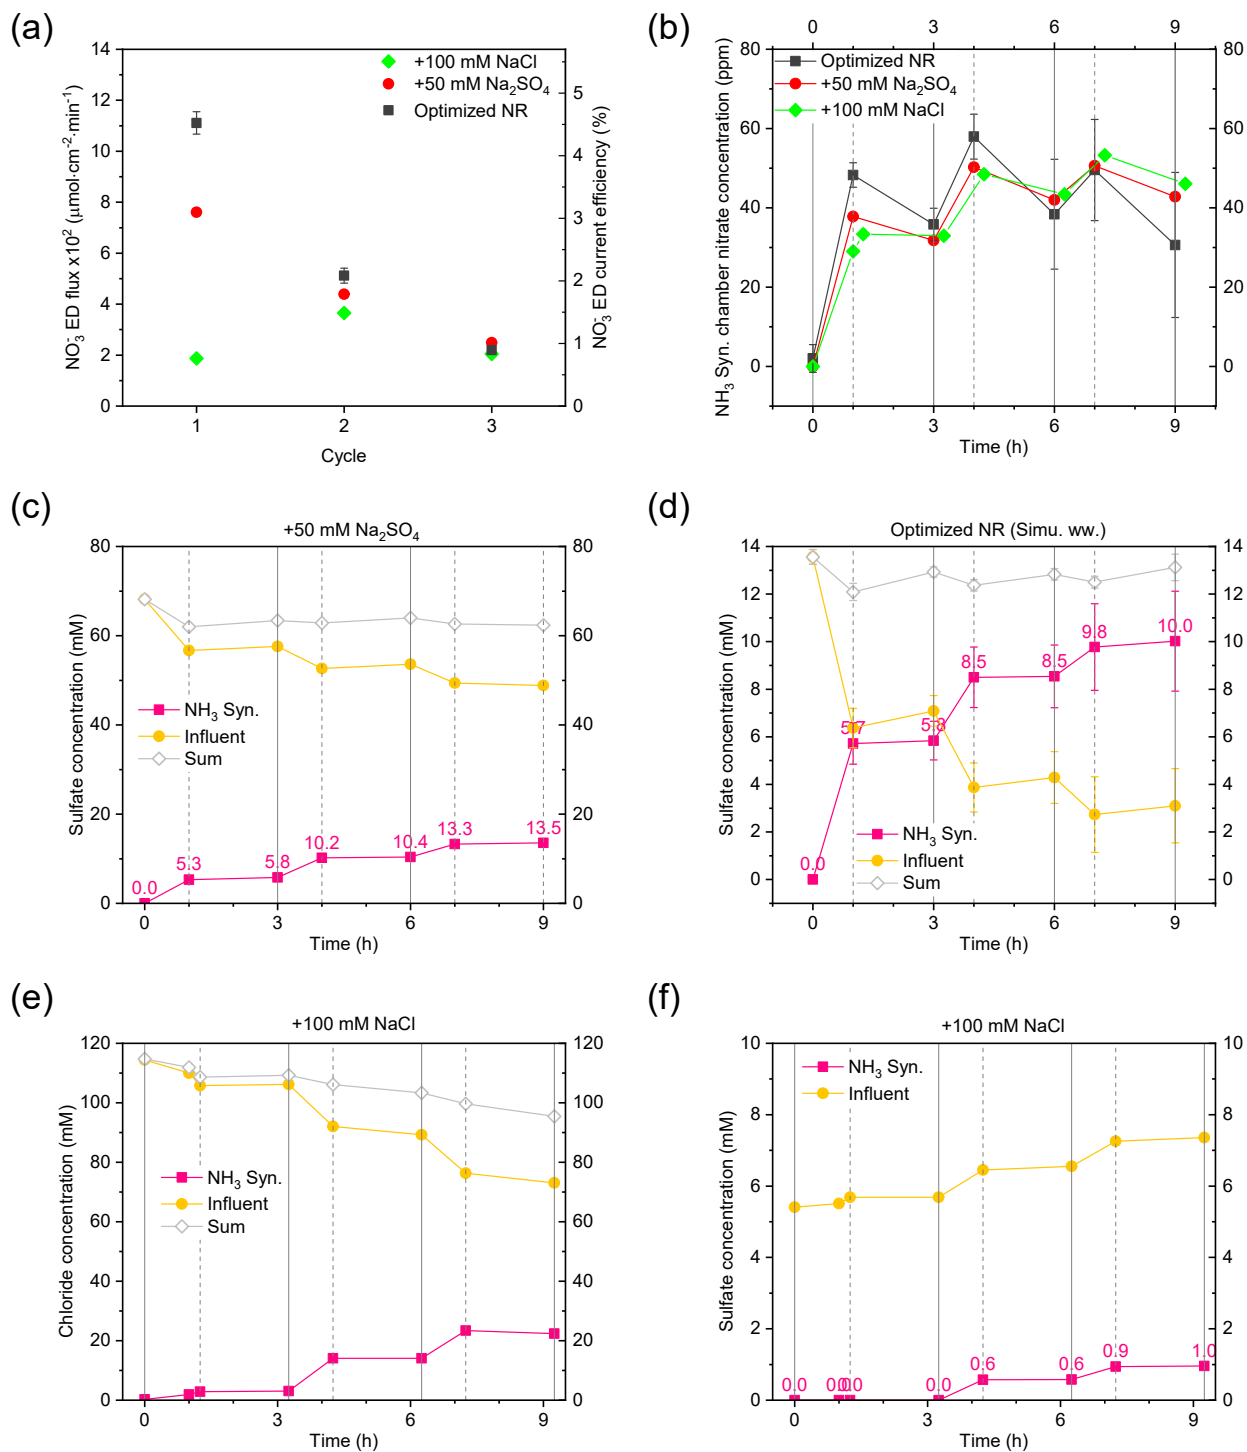

**Figure S23. Influent anion effects on ED.** (a) NO<sub>3</sub><sup>-</sup> ED flux (left y-axis) and NO<sub>3</sub><sup>-</sup> ED current efficiency (right y-axis) and (b) NH<sub>3</sub> synthesis chamber pH trend in EDNR experiments with various influent conditions. SO<sub>4</sub><sup>2-</sup> concentration trends in EDNR experiments using (c) SO<sub>4</sub><sup>2-</sup>-laden and (d) baseline simulated wastewaters. (e) Cl<sup>-</sup> and (f) SO<sub>4</sub><sup>2-</sup> concentration trends in EDNR experiments using Cl<sup>-</sup>-laden

simulated wastewater. EDNR cycles are indicated by solid vertical lines and stages are indicated by dash vertical lines. Error bars represent  $\pm$  one standard deviation.

We observed that the total  $\text{Cl}^-$  concentration within the system decreased over time because the chlorine evolution reaction (CER) occurred at the  $\text{NH}_3$  synthesis chamber  $\text{IrO}_2\text{-Ta}_2\text{O}_5/\text{Ti}$  mesh electrode during ED and at the influent chamber  $\text{IrO}_2\text{-Ta}_2\text{O}_5/\text{Ti}$  mesh electrode during NR, as a competitive process to water oxidation reaction ( $\sim 17\%$  decrease in sum  $\text{Cl}^-$  concentration after 3 cycles, accounting for 23% of total charge passed in ED + NR). Because CER does not produce protons, the  $\text{NH}_3$  synthesis chamber pH at the end of ED1 was 3.2, much higher than in optimized NR. We had to extend the ED stage by 15 min in ED1 before starting NR, but it was still more alkaline than the optimal pH identified in earlier experiments (**Fig. S24b**). However, for ED2 and ED3, we were able to achieve favorable  $\text{NH}_3$  synthesis chamber pH values using the same ED duration of 60 min.

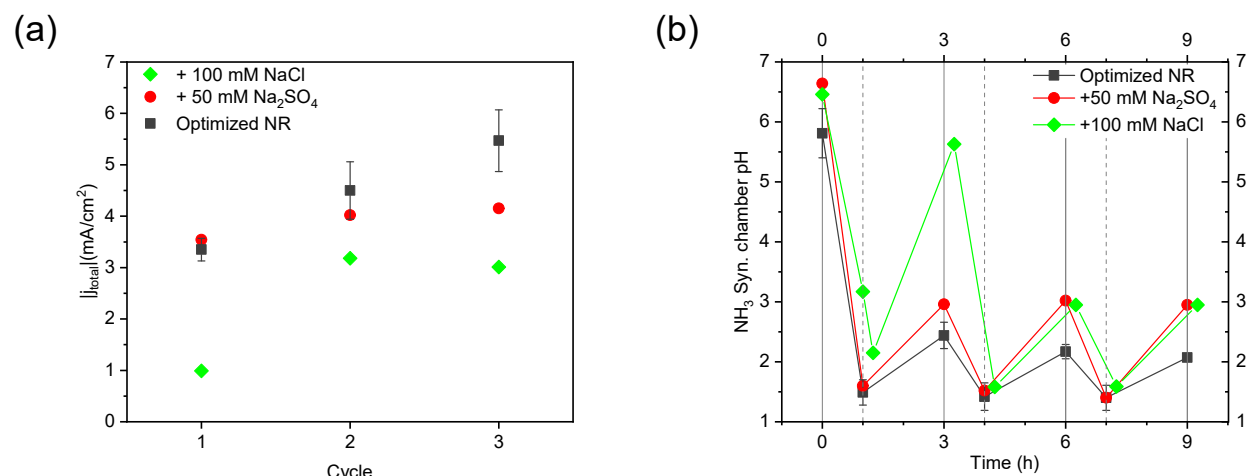

**Figure S24. Influent anion effects on NR.** (a) Absolute value of total current density in NR stages and (b)  $\text{NH}_3$  synthesis chamber pH trend in EDNR experiments with a variety of influent conditions. EDNR cycles are indicated by solid vertical lines and stages are indicated by dash vertical lines. Error bars represent  $\pm$  one standard deviation.



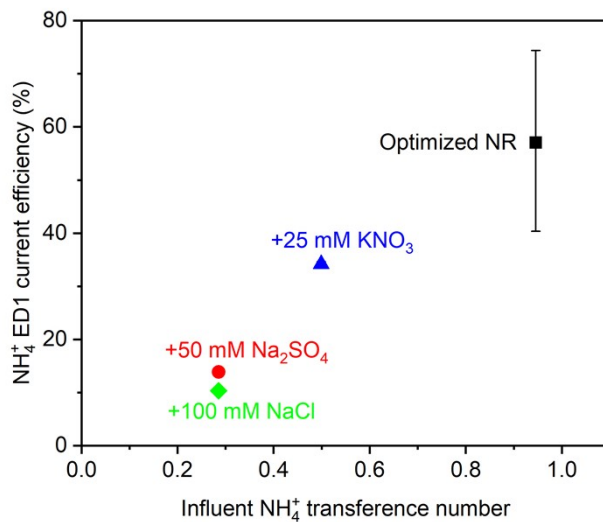

**Figure S25. Influent cation effects on ED.**  $\text{NH}_4^+$  ED current efficiency in ED1 with a variety of influent conditions. Error bars represent  $\pm$  one standard deviation.

### Section S3.3.2 Real wastewaters

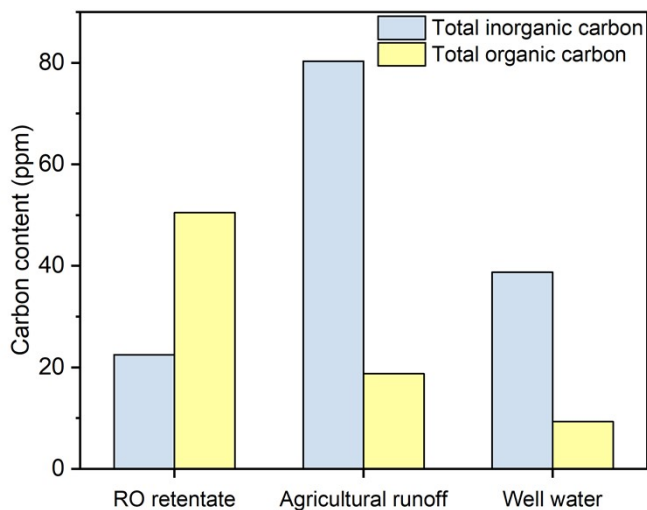

**Figure S26. Total inorganic and organic carbon contents in different wastewaters used as influents in EDNR experiments.** Triplicate or duplicate measurements were conducted for each sample, and the mean values are plotted.

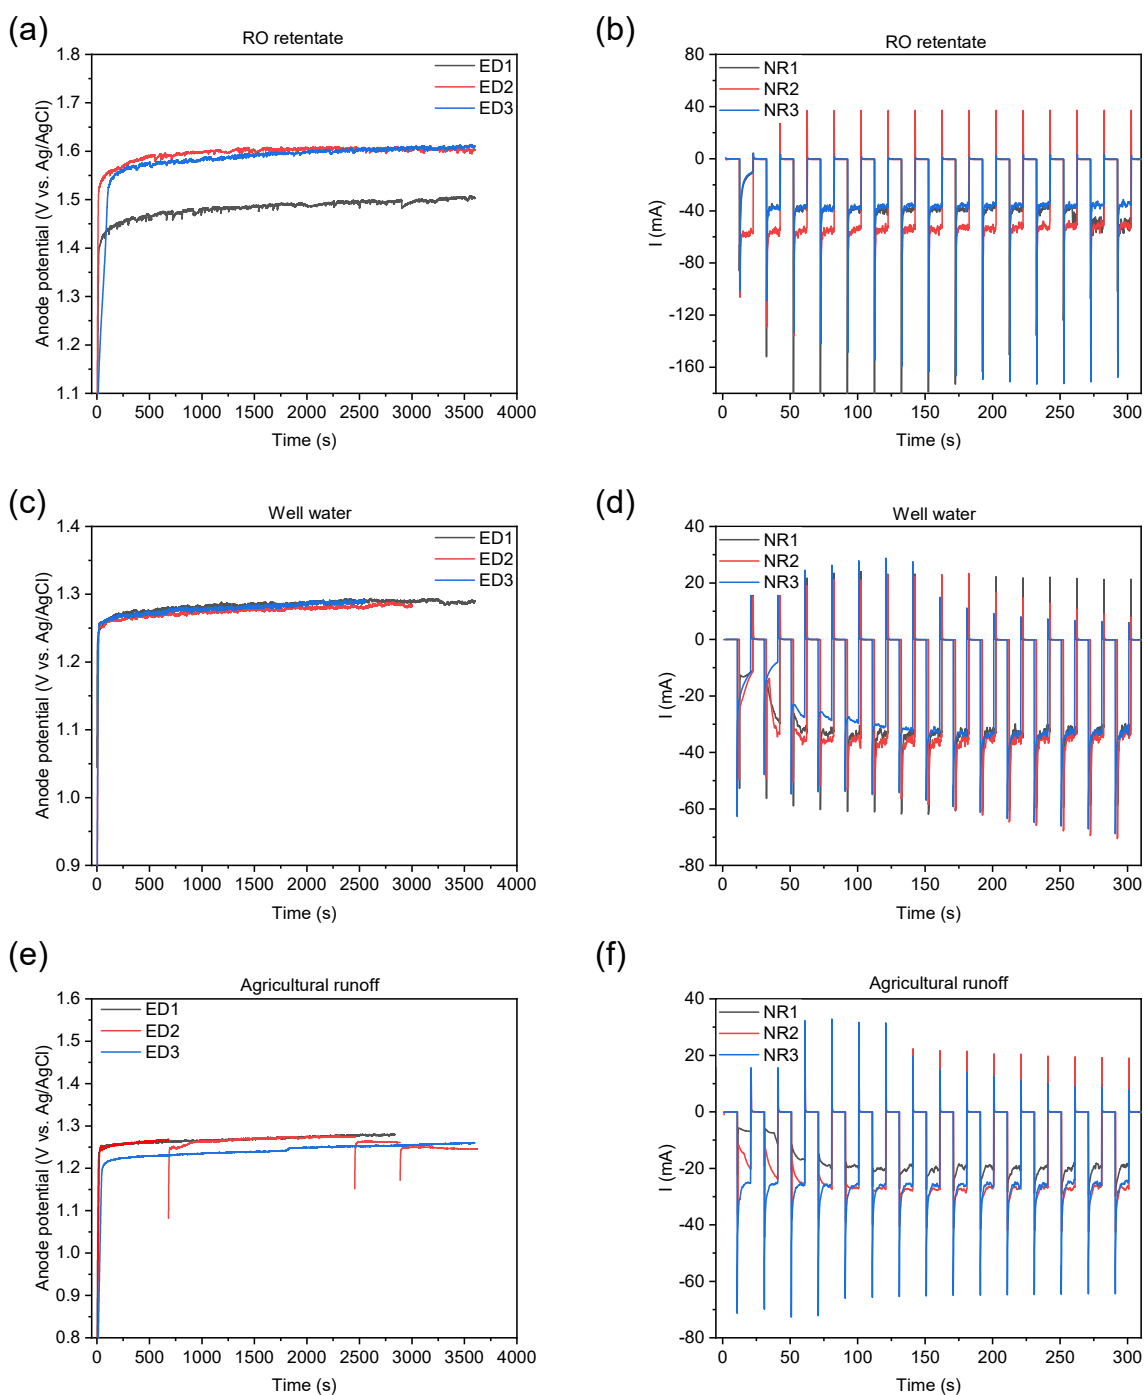

**Figure S27. Chronopotentiometry and chronoamperometry data from EDNR experiments using different real wastewater influents. (a)** Anode ( $\text{IrO}_2\text{-Ta}_2\text{O}_5/\text{Ti}$  mesh electrode in the  $\text{NH}_3$  synthesis chamber) potentials as functions of time in ED stages and **(b)** cathode (Ti electrode in the  $\text{NH}_3$  synthesis chamber) current in the first 5 min into each NR stage in the EDNR experiment using RO retentate. **(c)** Anode ( $\text{IrO}_2\text{-Ta}_2\text{O}_5/\text{Ti}$  mesh electrode in the  $\text{NH}_3$  synthesis chamber) potentials as functions of time in ED

stages and (d) cathode (Ti electrode in the NH<sub>3</sub> synthesis chamber) current in the first 5 min into each NR stage in the EDNR experiment using well water. (e) Anode (IrO<sub>2</sub>-Ta<sub>2</sub>O<sub>5</sub>/Ti mesh electrode in the NH<sub>3</sub> synthesis chamber) potentials as functions of time in ED stages and (f) cathode (Ti electrode in the NH<sub>3</sub> synthesis chamber) current in the first 5 min into each NR stage in the EDNR experiment using agricultural runoff. The average total current density from NR stages in all sets of experiments are given in Fig. S29a.

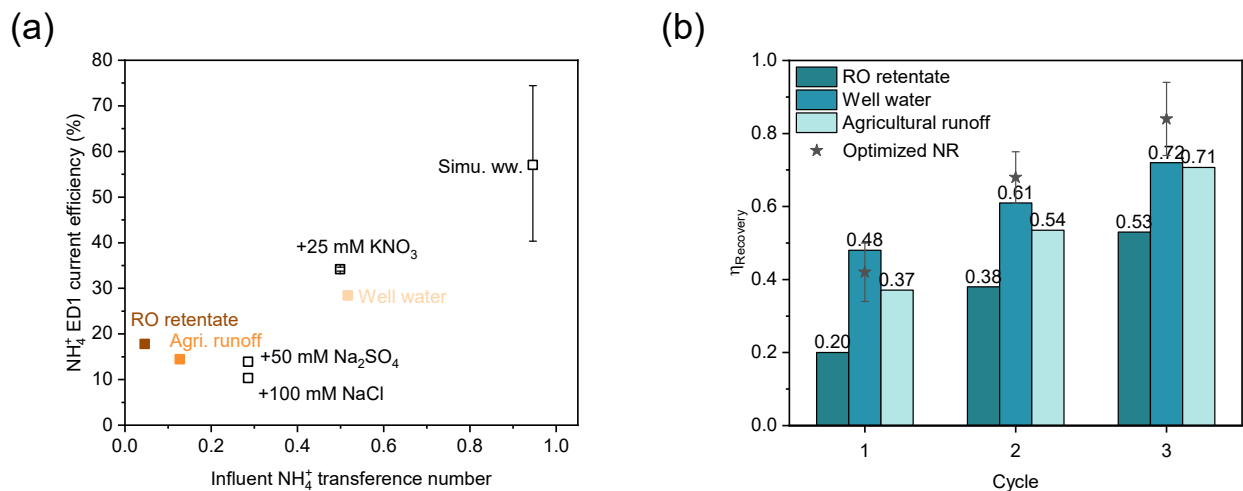

**Figure S28. ED performance in EDNR experiments using different real wastewater influents. (a)** NH<sub>4</sub><sup>+</sup> current efficiency in ED1, and (b) NH<sub>3</sub> recovery efficiency, in comparison with optimized NR experiments. Error bars represent ± one standard deviation for triplicate optimized NR experiments (all others n=1).

Similar to that observed in Cl<sup>-</sup>-laden experiment, the total amount of NO<sub>2</sub><sup>-</sup> in the experiment using RO retentate decreased over time (20.5% of the initial amount) due to CER. Note that because some wastewater feedstocks contain nitrite, the definition of NH<sub>3</sub> synthesis efficiency (η<sub>Synthesis</sub>) was revised to:

$$\eta_{\text{Synthesis, Cycle } i} = \frac{([\text{NH}_3]_{\text{Syn, NR } i} - [\text{NH}_3]_{\text{Syn, Ini}}) \times V_{\text{Syn}}}{([\text{NO}_3^-]_{\text{Inf, Ini}} + [\text{NO}_2^-]_{\text{Inf, Ini}}) \times V_{\text{Inf}}} \quad \text{Eqn. S15}$$

where [NH<sub>3</sub>]<sub>Syn, NR*i*</sub> is the NH<sub>3</sub> concentration in the NH<sub>3</sub> synthesis chamber at the end of the NR stage in EDNR cycle *i*, and [NO<sub>2</sub><sup>-</sup>]<sub>Inf, Ini</sub> is the initial NO<sub>2</sub><sup>-</sup> concentration in the influent before reaction starts. *V*<sub>Syn</sub> is the electrolyte volume of the NH<sub>3</sub> synthesis chamber and its corresponding reservoir (50 mL), and *V*<sub>Inf</sub> is the electrolyte volume of the influent chamber and its corresponding reservoir (50 mL).

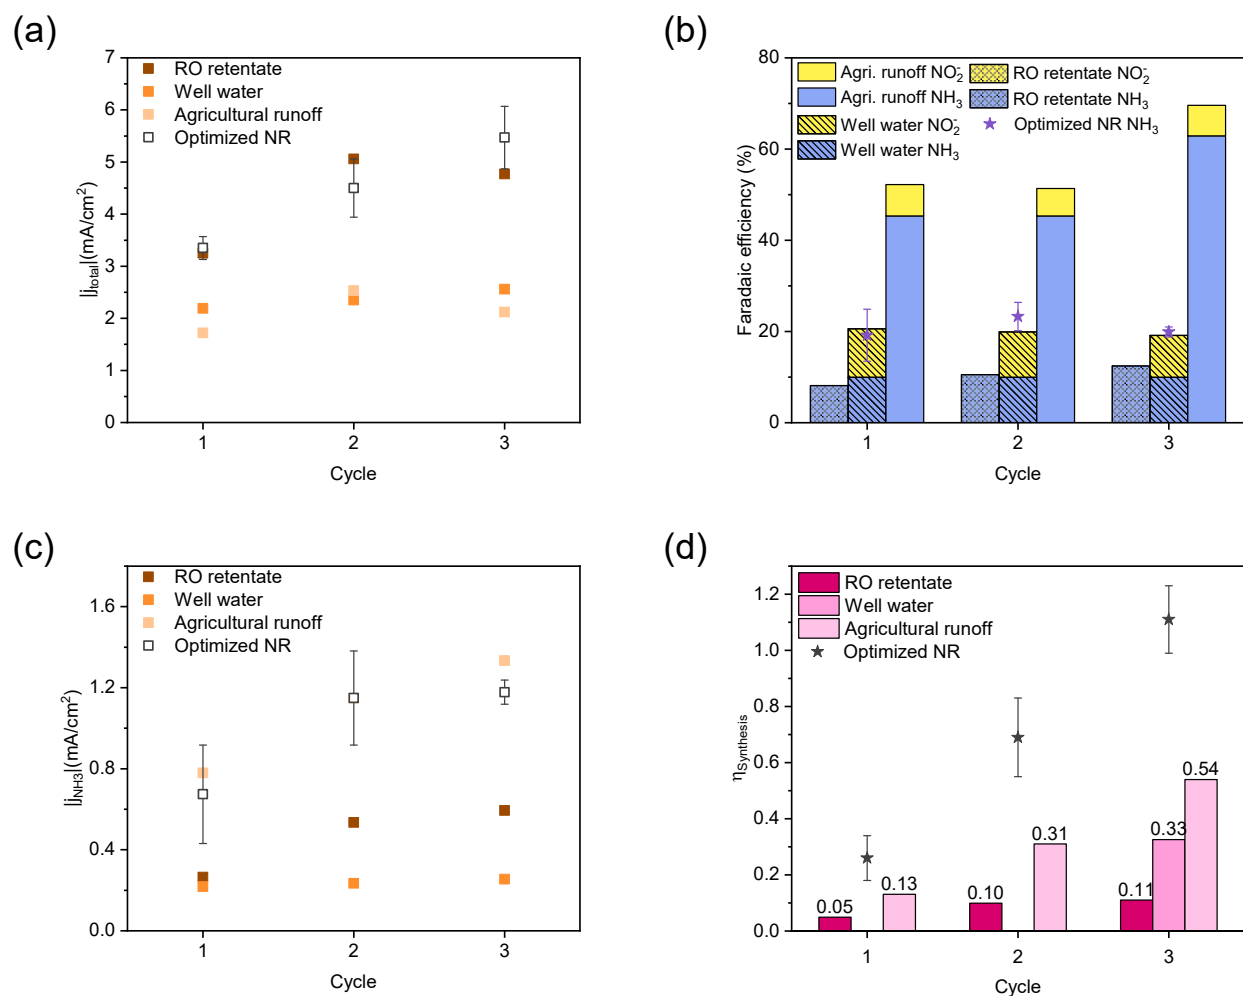

**Figure S29. NR performance in EDNR experiments using different wastewater influents. (a)** Absolute value of total current density, **(b)** Faradaic efficiency, **(c)** absolute value of NH<sub>3</sub> partial current density in NR stages, and **(d)** NH<sub>3</sub> synthesis efficiency, in comparison with optimized NR experiments. Error bars represent  $\pm$  one standard deviation.

Note that in 4-cycle EDNR experiments using NH<sub>4</sub><sup>+</sup>-enriched agricultural runoff influent, ED stage durations were shortened compared to the optimized NR experiments and varied between the two replicates to avoid full cell voltage overload (20 V). However, the total charge passed in all ED stages from the two replicates was almost identical (2% difference, **Figure S30a**).

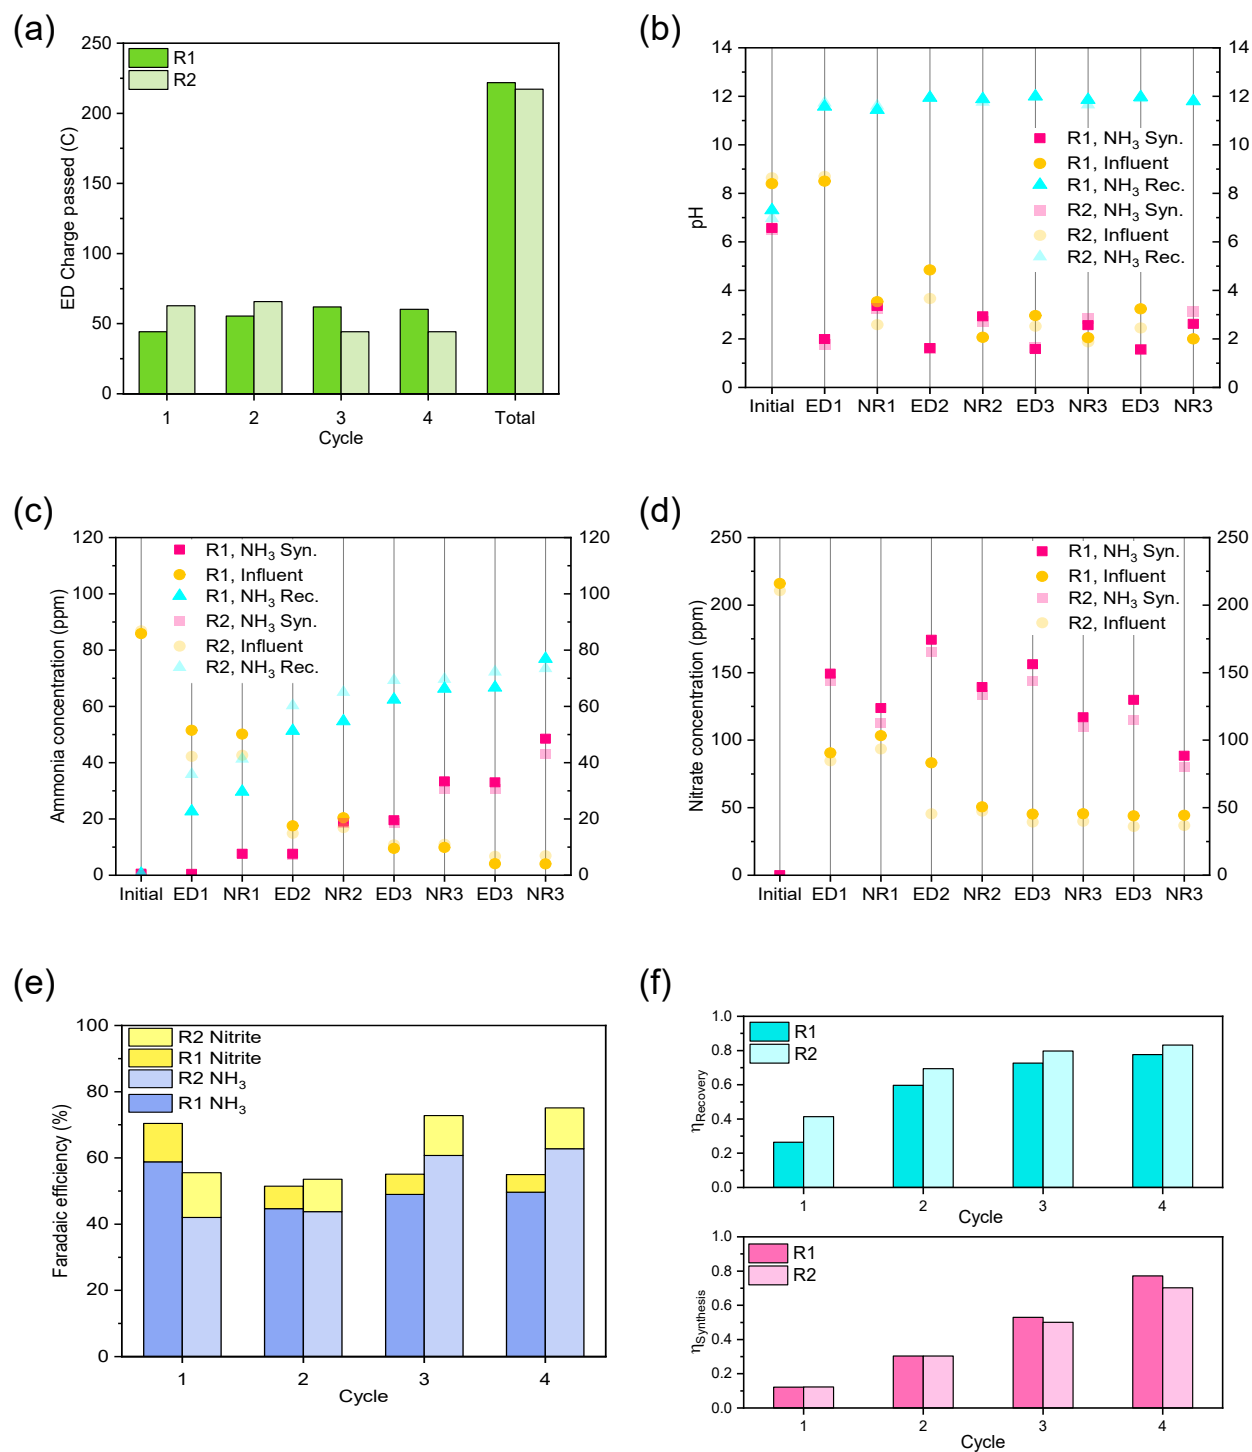

**Figure S30. 4-cycle EDNR using  $\text{NH}_4^+$ -enriched agricultural runoff influent.** Comparison of two replicate experiments (a) charge passed during ED stages, (b) pH trends, (c)  $\text{NH}_3$  concentration trends, (d)  $\text{NO}_3^-$  concentration trends, (e) Faradaic efficiency during NR stages, and (f)  $\text{NH}_3$  recovery (top panel) and synthesis efficiency (bottom panel). R1 and R2 represent Replicate #1 and Replicate #2, respectively.

### **Section S3.4 Long-term EDNR and product purification to treat agricultural runoff**

In long-term experiments, the applied current density during ED stages was calculated using the average charge passed in corresponding stage from the 4-cycle EDNR experiments and 60 min ED duration. As a result, the magnitude of applied current was lower than in optimized NR, and we applied a higher electrolyte flow rate in ED stages to compensate for the decreased amount of charge passed (see **Section S3.2.3**).

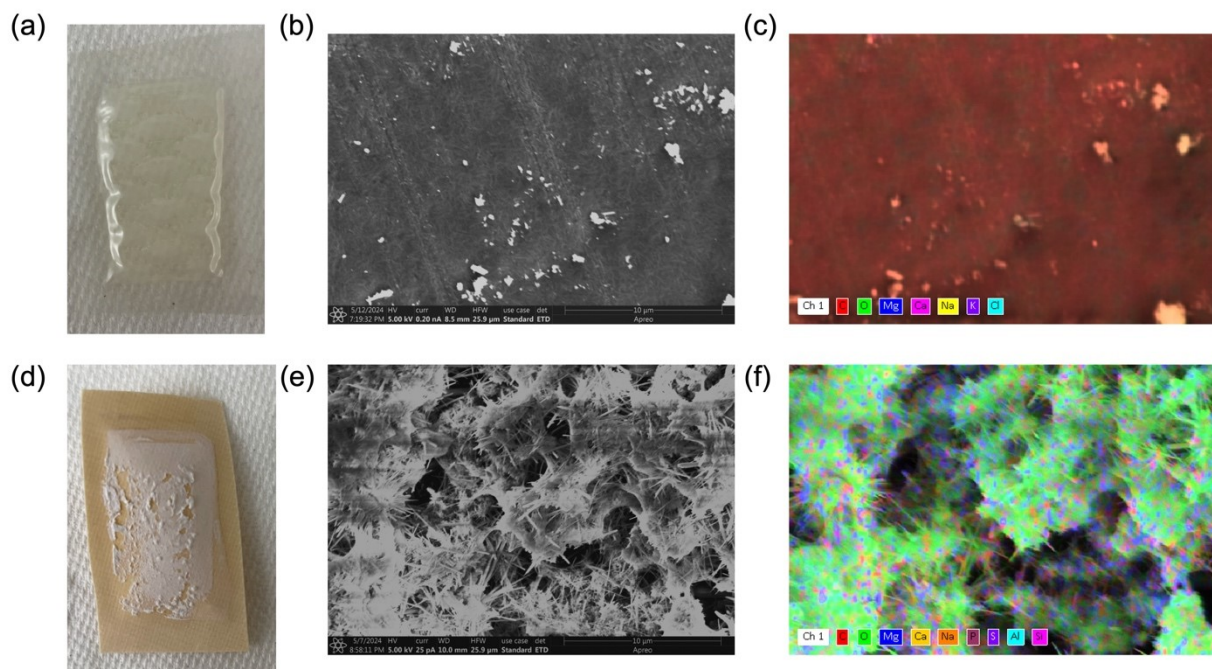

**Figure S31. Membranes after long-term experiments.** (a) Photo of the anion exchange membrane (the fouled side faced the  $\text{NH}_4^+$ -enriched agricultural runoff influent), (b) SEM image of the fouled side of the AEM, and (c) EDS of the same area. (d) Photo of the cation exchange membrane (the fouled side faced the  $\text{NH}_3$  recovery chamber), (e) SEM image of the fouled side of the CEM, and (f) EDS of the same area. EDS chemical composition data from (c) and (f) are shown in **Table S6**.

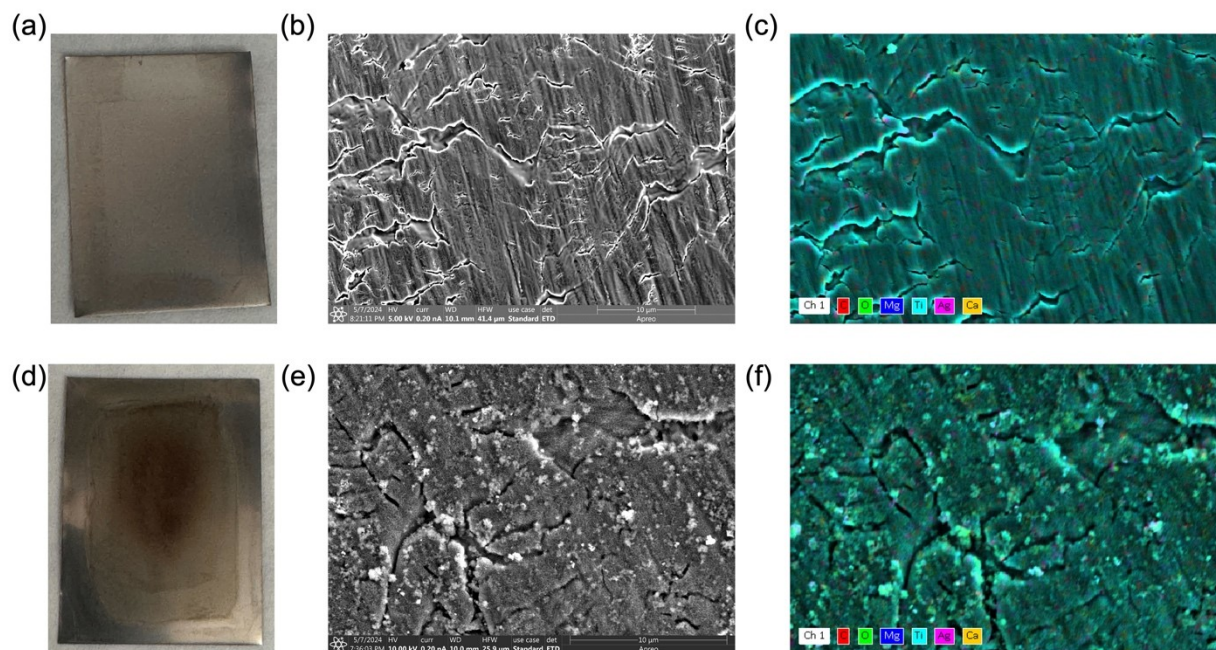

**Figure S32. Ti electrode after long-term experiments.** (a) Photo of the side of the Ti electrode that did not face the  $\text{NH}_3$  synthesis chamber, (b) SEM image of the unused side of the Ti electrode, and (c) EDS of the same area. (d) Photo of the side of the Ti electrode that faced the  $\text{NH}_3$  synthesis chamber electrolyte, (e) SEM image of the used side of the Ti electrode, and (f) EDS of the same area. ED chemical composition data from (c) and (f) are shown in **Table S6**.

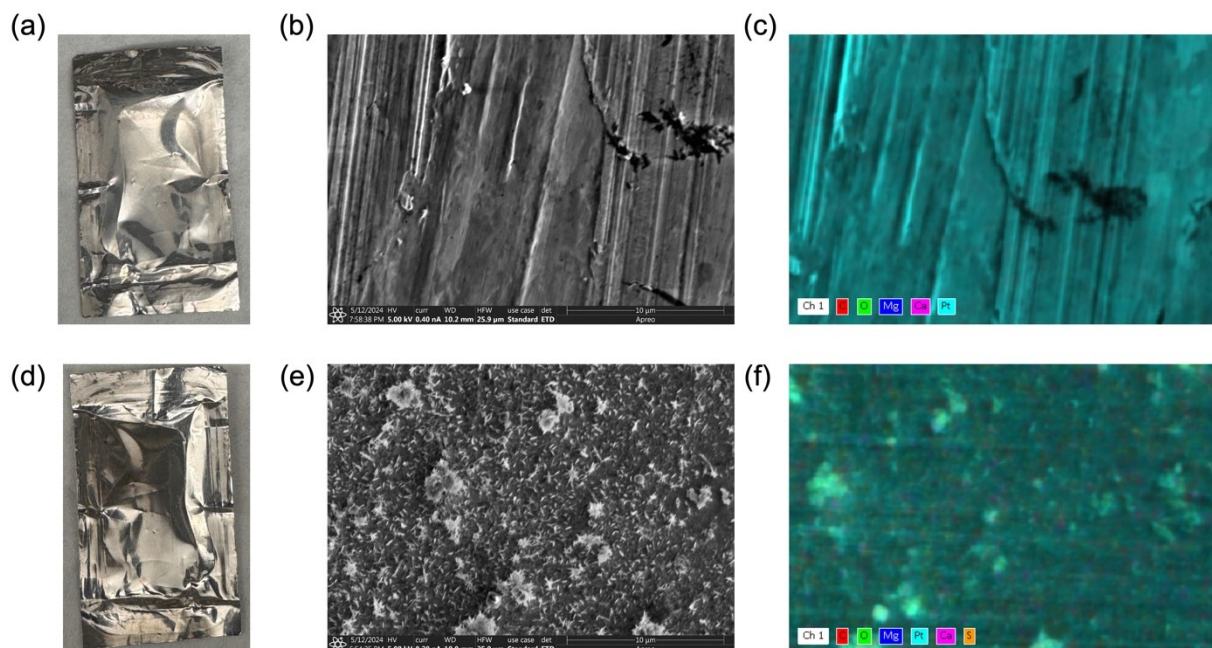

**Figure S33. Pt electrode after long-term experiments.** (a) Photo of the side of the Pt electrode that did not face the NH<sub>3</sub> recovery chamber, (b) SEM image of the unused side of the Pt electrode, and (c) EDS of the same area. (d) Photo of the side of the Pt electrode that faced the NH<sub>3</sub> synthesis chamber electrolyte, (e) SEM image of the used side of the Ti electrode, and (f) EDS of the same area. EDS chemical composition data from (c) and (f) are shown in **Table S6**.

**Table S6** Chemical composition of electrodes and membranes from long-term EDNR experiment characterized by SEM-EDS

| Element atomic %                              | C     | O     | Si   | S    | Cl   | P    | Na   | Mg   | K    | Ca    | Ti    | Pt    | Ag   |
|-----------------------------------------------|-------|-------|------|------|------|------|------|------|------|-------|-------|-------|------|
| Ti (unused side)                              | 7.55  | 11.85 | N.D. | 0.01 | N.D. | N.D. | 0.01 | N.D. | N.D. | 0.03  | 80.51 | N.D.  | 0.01 |
| Ti (facing NH <sub>3</sub> synthesis chamber) | 5.04  | 38.94 | N.D. | 0.07 | 0.03 | 0.05 | 0.24 | 0.94 | 0.02 | 0.09  | 54.17 | N.D.  | 0.41 |
| Pt (unused side)                              | 66.02 | 8.69  | N.D. | 0.96 | N.D. | N.D. | N.D. | N.D. | N.D. | 0.03  | N.D.  | 24.29 | N.D. |
| Pt (facing NH <sub>3</sub> recovery chamber)  | 49.99 | 28.90 | N.D. | 0.68 | N.D. | N.D. | 0.02 | 1.73 | N.D. | 0.66  | N.D.  | 18.03 | N.D. |
| CEM (facing influent)                         | 12.73 | 63.67 | 0.19 | 0.04 | 0.06 | N.D. | 0.10 | 9.36 | N.D. | 13.86 | N.D.  | N.D.  | N.D. |
| AEM (facing NH <sub>3</sub> recovery chamber) | 89.56 | 7.21  | N.D. | N.D. | 3.09 | N.D. | 0.06 | 0.04 | N.D. | 0.04  | N.D.  | N.D.  | N.D. |

\*N.D. stands for not detected.



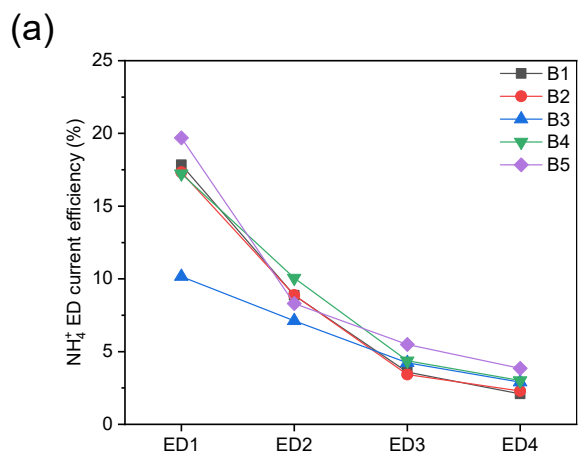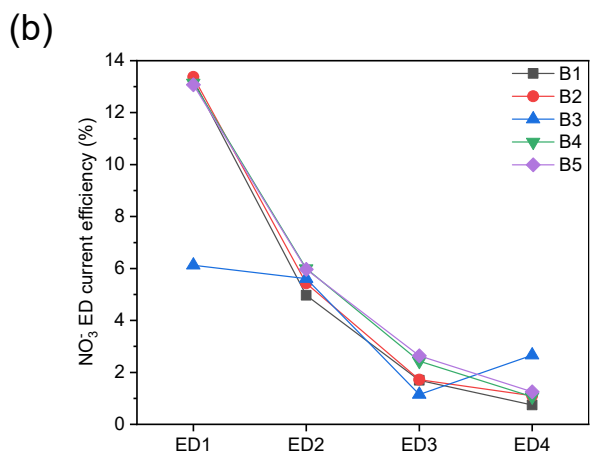

**Figure S34. Long-term experiment ED.** (a)  $\text{NH}_4^+$  ED current efficiency and (b)  $\text{NO}_3^-$  ED current efficiency. B1–5 represents batch 1–5. The influent was  $\text{NH}_4^+$ -enriched agricultural runoff.

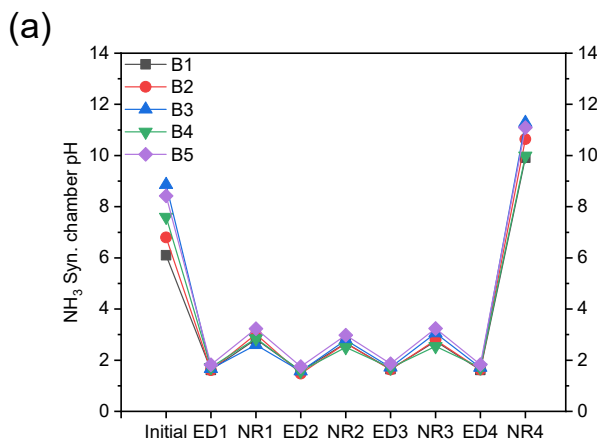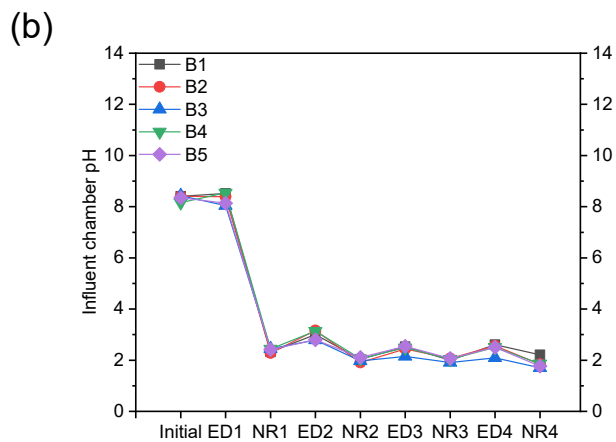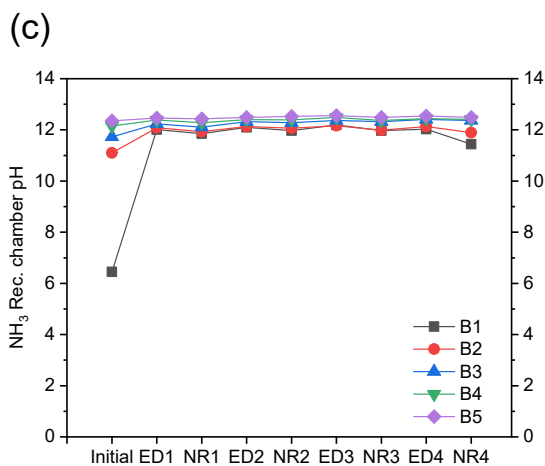

**Figure S35. Long-term EDNR experiment pH.** (a)  $\text{NH}_3$  synthesis, (b) influent, and (c)  $\text{NH}_3$  recovery chamber pH trends. B1–5 represents batch 1–5. The influent was  $\text{NH}_4^+$ -enriched agricultural runoff.

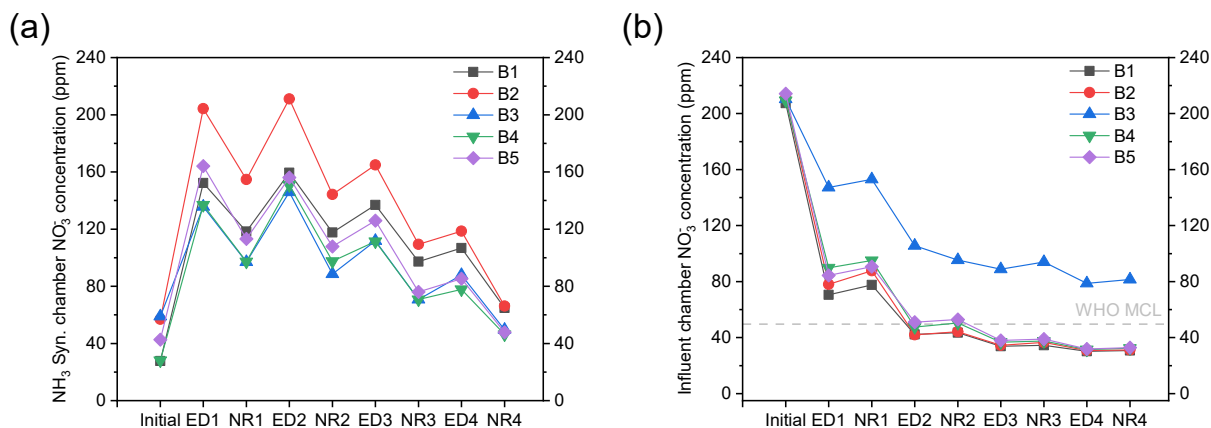

**Figure S36. Long-term experiment  $\text{NO}_3^-$  concentrations.** (a)  $\text{NH}_3$  synthesis and (b) influent chamber  $\text{NO}_3^-$  concentration trends. Dashed line represents MCL for  $\text{NO}_3^-$  in drinking water set by the World Health Organization (10 ppm  $\text{NO}_3^-$ -N).<sup>2</sup> B1–5 represents batch 1–5. The influent was  $\text{NH}_4^+$ -enriched agricultural runoff.

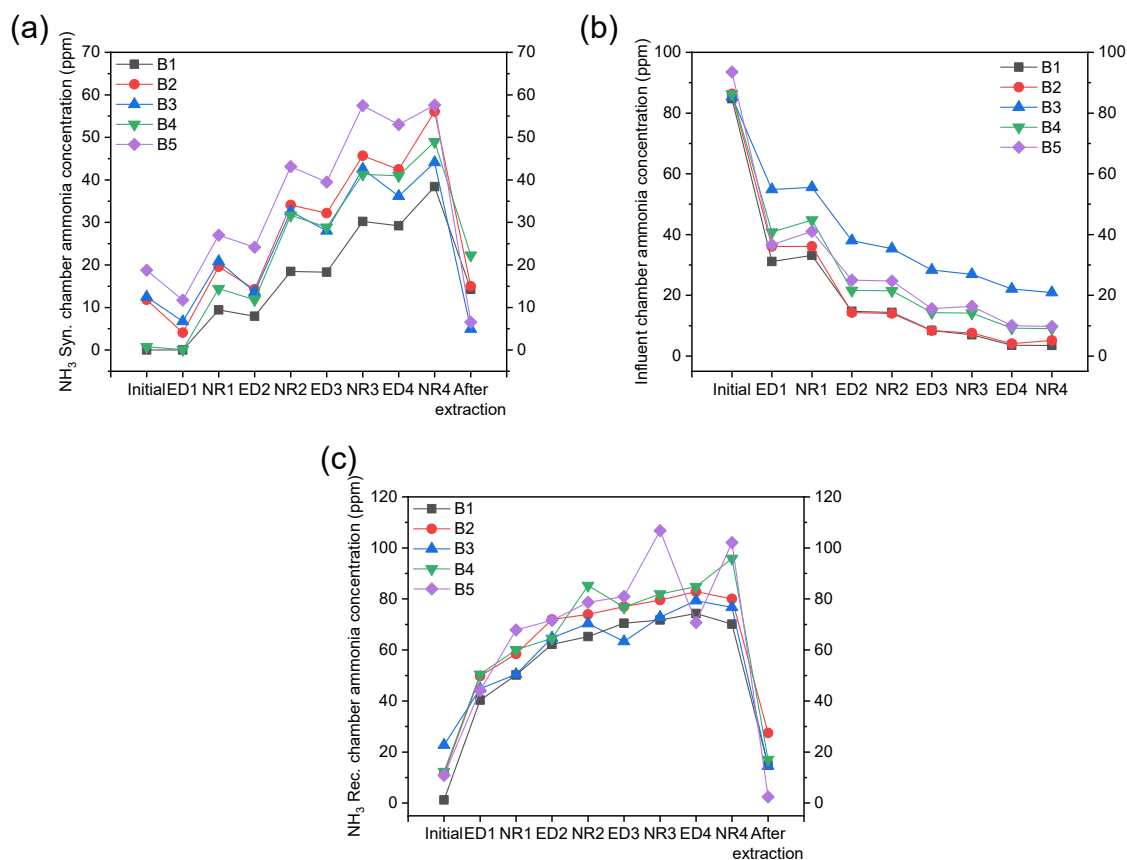

**Figure S37. Long-term experiment NH<sub>3</sub> concentrations.** (a) NH<sub>3</sub> synthesis, (b) influent, and (c) NH<sub>3</sub> recovery chamber NH<sub>3</sub> concentration. B1–5 represents batch 1–5. Influent was  $\text{NH}_4^+$ -enriched agricultural runoff.

**Table S7** Concentrations of  $\text{Na}^+$  and  $\text{ClO}_4^-$  in the initial and final samples of the long-term EDNR experiment

|                                                                               | NH <sub>3</sub> synthesis chamber | Influent chamber (Agricultural runoff) | NH <sub>3</sub> recovery chamber |
|-------------------------------------------------------------------------------|-----------------------------------|----------------------------------------|----------------------------------|
| Initial $\text{Na}^+$ conc. before long-term EDNR started                     | 1072.7±24.0 mM*                   | 6.6 mM                                 | 1072.7±24.0 mM*                  |
| Final $\text{Na}^+$ conc. after the last batch of long-term EDNR (batch 5)    | 799.5 mM                          | 9.5 mM                                 | 732.3 mM                         |
| Initial $\text{ClO}_4^-$ conc. before long-term EDNR started                  | 968.0±12.1 mM <sup>#</sup>        | 0                                      | 968.0±12.1 mM <sup>#</sup>       |
| Final $\text{ClO}_4^-$ conc. after the last batch of long-term EDNR (batch 5) | 1151.1 mM                         | 25.0 mM                                | 896.3 mM                         |

\* Measured using the 1 M  $\text{NaClO}_4$  stock solution, ± represents standard deviations from triplicate measurements.

# Measured using the 1 M NaClO<sub>4</sub> stock solution, ± represents standard deviations from triplicate measurements.

We noted that a significant portion of Na<sup>+</sup> was lost from both NH<sub>3</sub> synthesis and NH<sub>3</sub> recovery chambers after the long-term EDNR experiment, likely due to several factors. For both chambers, because a large dilution factor (1000 times) was used in preparing liquid samples for cation chromatography measurements, the measurement variance was high (24 mM in measuring the 1 M NaClO<sub>4</sub> stock solution) and account for *ca.* 7–9% of the Na<sup>+</sup> loss. For the NH<sub>3</sub> recovery chamber, Na<sup>+</sup> diffused (during ED stages) and migrated (during NR stages) across the CEM into the influent over five batches (up to 17.5 mM), while a large portion of Na<sup>+</sup> could be incorporated into the CEM during such movement (*ca.* 140 mM, calculated based on the CEM ion exchange capacity). For the NH<sub>3</sub> synthesis chamber, Na<sup>+</sup> could be incorporated into the AEM due to its imperfect co-ion exclusion, especially in electrolyte concentrations comparable to the membrane fixed charge density based on Donnan theory (uptake ≥ 50% in electrolytes with ≥ 0.89 M Na<sup>+22</sup>). Meanwhile, we observed that after the long-term EDNR experiment, there was an additional 2.5 mM Ca<sup>2+</sup> and 49 mM Mg<sup>2+</sup> in the NH<sub>3</sub> recovery chamber, and an additional 7 mM K<sup>+</sup> in the NH<sub>3</sub> synthesis chamber.

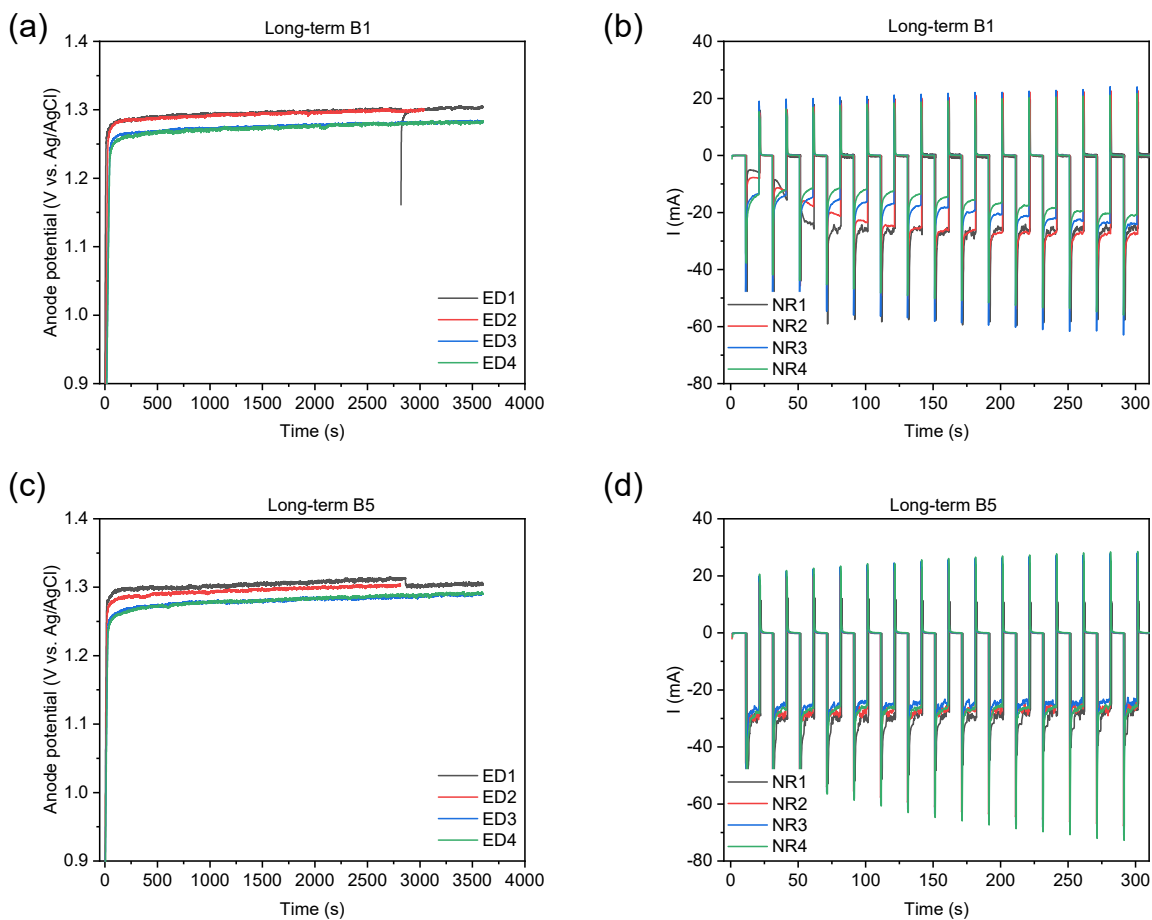

**Figure S38. Chronopotentiometry and chronoamperometry data from long-term EDNR experiments.** (a) Anode ( $\text{IrO}_2\text{-Ta}_2\text{O}_5/\text{Ti}$  mesh electrode in the  $\text{NH}_3$  synthesis chamber) potentials as functions of time in ED stages and (b) cathode (Ti electrode in the  $\text{NH}_3$  synthesis chamber) current in the first 5 min into each NR stage in long-term EDNR batch 1. (c) Anode ( $\text{IrO}_2\text{-Ta}_2\text{O}_5/\text{Ti}$  mesh electrode in the  $\text{NH}_3$  synthesis chamber) potentials as functions of time in ED stages and (d) cathode (Ti electrode in the  $\text{NH}_3$  synthesis chamber) current in the first 5 min into each NR stage in long-term EDNR batch 5. The average total current density from NR stages in all sets of experiments are given in **Fig. S39**.

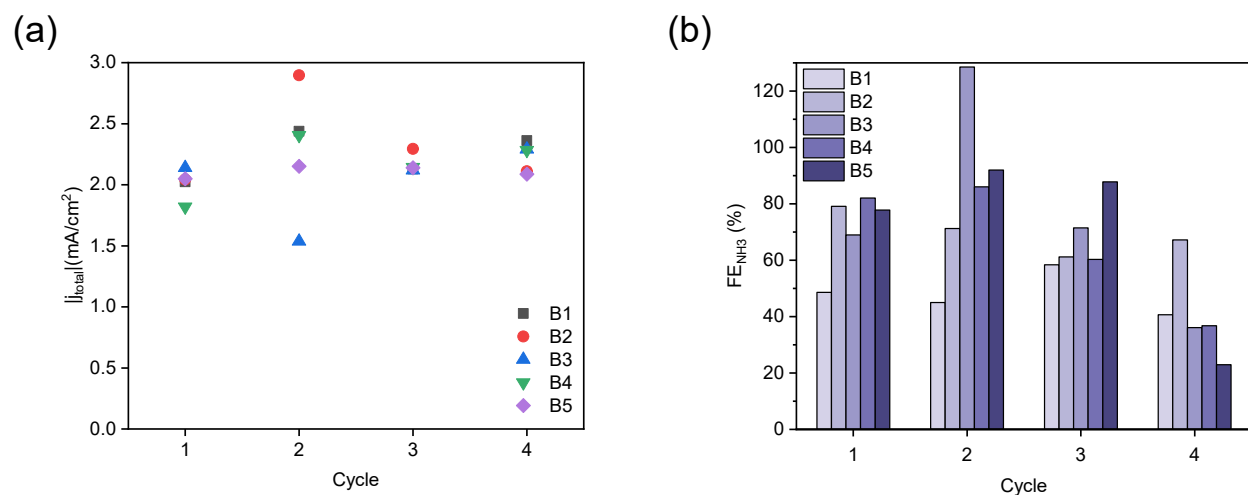

**Figure S39. Long-term experiment NR performance.** (a) Absolute value of total current density and (b)  $\text{NH}_3$  Faradaic efficiency in NR stages. B1–5 represents batch 1–5. The influent was  $\text{NH}_4^+$ -enriched agricultural runoff.

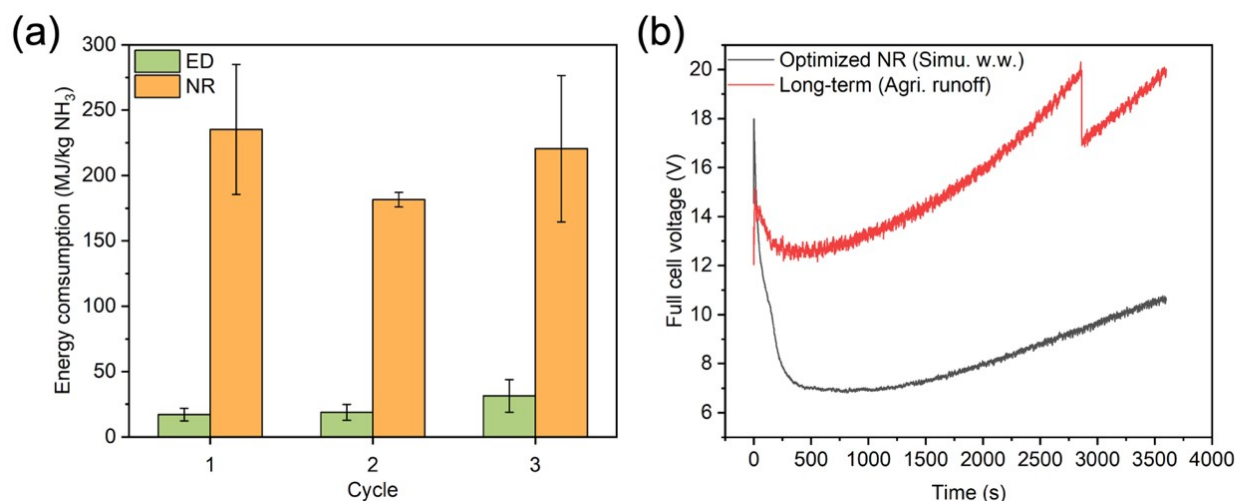

**Figure S40. Energy consumption comparison.** (a) Energy consumption from ED and NR stages in optimized NR experiments using simulated wastewater influent. Error bars represent  $\pm$  one standard deviation. (b) Comparison of full cell voltage in ED1 from one optimized NR replicate and ED1 from B5 of long-term EDNR experiment.

**Table S8** Energy consumption in electrochemical NH<sub>3</sub> manufacturing technologies using feedstocks with environmentally relevant Nr concentrations

| Electrochemical technology                                                              | Feedstock                                                 | Feedstock Nr level                                                         | Product separation        | Product                                                                                                                                 | Energy consumption             |
|-----------------------------------------------------------------------------------------|-----------------------------------------------------------|----------------------------------------------------------------------------|---------------------------|-----------------------------------------------------------------------------------------------------------------------------------------|--------------------------------|
| Bipolar electrodialysis stack <sup>23</sup>                                             | Synthetic wastewater                                      | 18.7 mM NH <sub>3</sub>                                                    | Membrane stripping        | (NH <sub>4</sub> ) <sub>2</sub> SO <sub>4</sub> and H <sub>2</sub> SO <sub>4</sub> mixture with pH 3 (concentration not reported)       | 18.3 MJ/kg NH <sub>3</sub> -N  |
| Electrochemical ammonia accumulation <sup>24</sup>                                      | Livestock wastewater                                      | 178–214 mM NH <sub>3</sub>                                                 | None                      | 1.26 M NH <sub>3</sub> and 0.5 M Na <sub>2</sub> SO <sub>4</sub> mixture                                                                | 101.5 MJ/kg NH <sub>3</sub> -N |
| Hydrophobic membrane coated cathode <sup>25</sup>                                       | Synthetic anaerobic concentrate                           | 71.4 mM NH <sub>3</sub>                                                    | Membrane stripping        | 44.6 mM NH <sub>3</sub> and 50 mM H <sub>3</sub> PO <sub>4</sub> , Na <sub>2</sub> HPO <sub>4</sub> mixture                             | 57.6 MJ/kg NH <sub>3</sub> -N  |
| Electrodialysis-electrochemical ammonia stripping <sup>26</sup>                         | Anaerobic digestate                                       | 100.3 mM NH <sub>3</sub>                                                   | Membrane stripping        | 237.8 mM NH <sub>3</sub> as NH <sub>4</sub> H <sub>2</sub> PO <sub>4</sub> and (NH <sub>4</sub> ) <sub>2</sub> HPO <sub>4</sub> mixture | 50.7 MJ/kg NH <sub>3</sub> -N  |
| Integrated flow-electrode capacitive deionization and flow cathode system <sup>27</sup> | Simulated groundwater                                     | 2.2 mM NO <sub>3</sub> <sup>-</sup>                                        | Membrane stripping        | 0.5 mM (NH <sub>4</sub> ) <sub>2</sub> SO <sub>4</sub> and 0.5 M H <sub>2</sub> SO <sub>4</sub> mixture                                 | 31400 MJ/kg NH <sub>3</sub> -N |
| Bifunctional nitrate adsorption-reduction electrode                                     | Agricultural tile drainage water                          | 0.27 mM NO <sub>3</sub> <sup>-</sup>                                       | None                      | 2.0 mM NH <sub>3</sub> in the feedstock mixture                                                                                         | 904.7 MJ/kg NH <sub>3</sub> -N |
| Concurrent electrocatalysis and membrane extraction <sup>28,29</sup>                    | Synthetic wastewater                                      | 20 mM NO <sub>3</sub> <sup>-</sup>                                         | Membrane stripping        | 38 mM (NH <sub>4</sub> ) <sub>2</sub> SO <sub>4</sub> and 62 mM H <sub>2</sub> SO <sub>4</sub> mixture                                  | 644.4 MJ/kg NH <sub>3</sub> -N |
| Electrified membrane <sup>30</sup>                                                      | Synthetic wastewater                                      | 25 mM NO <sub>3</sub> <sup>-</sup>                                         | Membrane stripping        | 10 mM (NH <sub>4</sub> ) <sub>2</sub> SO <sub>4</sub> and 0.5 M acidified Na <sub>2</sub> SO <sub>4</sub> mixture                       | 1962 MJ/kg NH <sub>3</sub> -N  |
| Membrane-free alkaline electrolyzer <sup>31</sup>                                       | KNO <sub>3</sub> solution                                 | 7.14 mM NO <sub>3</sub> <sup>-</sup>                                       | Water absorption at 5 °C  | 4.12 M NH <sub>3</sub> solution                                                                                                         | 168.2 MJ/kg NH <sub>3</sub> -N |
| Integrated nitrate reduction and electrochemical stripping <sup>32</sup>                | Mixture of real secondary effluent and RO brine           | 2.0 mM NO <sub>3</sub> <sup>-</sup>                                        | Electrochemical stripping | 1.3 mM (NH <sub>4</sub> ) <sub>2</sub> SO <sub>4</sub> and 0.1 M H <sub>2</sub> SO <sub>4</sub> mixture                                 | 1224 MJ/kg NH <sub>3</sub> -N  |
| EDNR (This work)                                                                        | Synthetic wastewater                                      | 27.8 mM NH <sub>4</sub> <sup>+</sup> + 1.6 mM NO <sub>3</sub> <sup>-</sup> | None                      | In 1 M NaClO <sub>4</sub>                                                                                                               | 245 MJ/kg NH <sub>3</sub> -N   |
| EDNR (This work)                                                                        | NH <sub>4</sub> <sup>+</sup> enriched agricultural runoff | 4.8 mM NH <sub>4</sub> <sup>+</sup> + 3.3 mM NO <sub>3</sub> <sup>-</sup>  | Membrane stripping        | 101 mM NH <sub>3</sub> as NH <sub>4</sub> H <sub>2</sub> PO <sub>4</sub> and (NH <sub>4</sub> ) <sub>2</sub> HPO <sub>4</sub> mixture   | 920 MJ/kg NH <sub>3</sub> -N   |

In addition to the discussion around energy consumption provided in the main manuscript, we would like to comment on the cost aspect as well. The EDNR process employs electro dialysis to separate  $\text{NH}_4^+$  and  $\text{NO}_3^-$  from polluted wastewater influent and reactions to recover  $\text{NH}_3$  from  $\text{NH}_4^+$  (using  $\text{OH}^-$  generated from water reduction reaction) and synthesize  $\text{NH}_3$  from  $\text{NO}_3^-$  (nitrate reduction reaction). For the reaction step (NR), there has not been commercialized systems to compare with to the authors' knowledge. For the separation step (ED), a commercialized and popular technique to separate  $\text{NH}_4^+$  and  $\text{NO}_3^-$  from wastewater is ion exchange. Although the adsorption process itself consumes very little energy, the ion exchange resins need to be regenerated often with concentrated acid, base, or salt solutions, which leads to secondary waste. The cost of purchasing these chemicals to regenerate the ion exchange resins contributes to 30-55% of all operating cost of a proposed plant using municipal wastewater influent.<sup>33,34</sup> It is hard to draw a direct comparison of cost per  $\text{NH}_3$  produced between EDNR and commercialized ion exchange technologies because the EDNR process is still at bench-scale and under development. But there are several advantages of EDNR that could possibly reduce the cost compared to the ion exchange system: (1) uses electrical field as the driving force for  $\text{NH}_4^+$  and  $\text{NO}_3^-$  separation and avoids the usage of chemicals and their associated transportation cost, (2) can operate continuously and avoids the off time needed for resin regeneration, and (3) doesn't generate secondary waste stream from regeneration that needs to be processed. Although cost is out of scope of the current work, we plan to conduct future work on developing a techno-economic analysis model of the EDNR process.

In future efforts to scale up the EDNR process, we note that  $\text{H}_2$  is generated as a side product. Although it might require additional engineering strategies to manage its related safety hazard, it can also be collected as a profitable product stream.



## References

- (1) O'Dell, J. W. DETERMINATION OF AMMONIA NITROGEN BY SEMI-AUTOMATED COLORIMETRY. In *Methods for the Determination of Metals in Environmental Samples*; Elsevier, 1996; pp 434–448. <https://doi.org/10.1016/B978-0-8155-1398-8.50024-0>.
- (2) Ward, M. H.; Jones, R. R.; Brender, J. D.; de Kok, T. M.; Weyer, P. J.; Nolan, B. T.; Villanueva, C. M.; van Breda, S. G. Drinking Water Nitrate and Human Health: An Updated Review. *Int J Environ Res Public Health* **2018**, *15* (7), 1557. <https://doi.org/10.3390/ijerph15071557>.
- (3) McEnaney, J. M.; Blair, S. J.; Nielander, A. C.; Schwalbe, J. A.; Koshy, D. M.; Cargnello, M.; Jaramillo, T. F. Electrolyte Engineering for Efficient Electrochemical Nitrate Reduction to Ammonia on a Titanium Electrode. *ACS Sustainable Chem. Eng.* **2020**, *8* (7), 2672–2681. <https://doi.org/10.1021/acssuschemeng.9b05983>.
- (4) Wu, Z.-Y.; Karamad, M.; Yong, X.; Huang, Q.; Cullen, D. A.; Zhu, P.; Xia, C.; Xiao, Q.; Shakouri, M.; Chen, F.-Y.; Kim, J. Y. (Timothy); Xia, Y.; Heck, K.; Hu, Y.; Wong, M. S.; Li, Q.; Gates, I.; Siahrostami, S.; Wang, H. Electrochemical Ammonia Synthesis via Nitrate Reduction on Fe Single Atom Catalyst. *Nat Commun* **2021**, *12* (1), 2870. <https://doi.org/10.1038/s41467-021-23115-x>.
- (5) Gao, Q.; Pillai, H. S.; Huang, Y.; Liu, S.; Mu, Q.; Han, X.; Yan, Z.; Zhou, H.; He, Q.; Xin, H.; Zhu, H. Breaking Adsorption-Energy Scaling Limitations of Electrocatalytic Nitrate Reduction on Intermetallic CuPd Nanocubes by Machine-Learned Insights. *Nat Commun* **2022**, *13* (1), 2338. <https://doi.org/10.1038/s41467-022-29926-w>.
- (6) Murphy, E.; Liu, Y.; Matanovic, I.; Guo, S.; Tieu, P.; Huang, Y.; Ly, A.; Das, S.; Zenyuk, I.; Pan, X.; Spoecker, E.; Atanassov, P. Highly Durable and Selective Fe- and Mo-Based Atomically Dispersed Electrocatalysts for Nitrate Reduction to Ammonia via Distinct and Synergized NO<sub>2</sub>– Pathways. *ACS Catal.* **2022**, 6651–6662. <https://doi.org/10.1021/acscatal.2c01367>.
- (7) Crawford, J.; Yin, H.; Du, A.; O'Mullane, A. P. Nitrate-to-Ammonia Conversion at an InSn-Enriched Liquid-Metal Electrode. *Angewandte Chemie* **2022**, *134* (23), e202201604. <https://doi.org/10.1002/ange.202201604>.
- (8) Wang, Y.; Xu, A.; Wang, Z.; Huang, L.; Li, J.; Li, F.; Wicks, J.; Luo, M.; Nam, D.-H.; Tan, C.-S.; Ding, Y.; Wu, J.; Lum, Y.; Dinh, C.-T.; Sinton, D.; Zheng, G.; Sargent, E. H. Enhanced Nitrate-to-Ammonia Activity on Copper–Nickel Alloys via Tuning of Intermediate Adsorption. *J. Am. Chem. Soc.* **2020**, *142* (12), 5702–5708. <https://doi.org/10.1021/jacs.9b13347>.
- (9) Chen, F.-Y.; Wu, Z.-Y.; Gupta, S.; Rivera, D. J.; Lambeets, S. V.; Pecaut, S.; Kim, J. Y. T.; Zhu, P.; Finprock, Y. Z.; Meira, D. M.; King, G.; Gao, G.; Xu, W.; Cullen, D. A.; Zhou, H.; Han, Y.; Perea, D. E.; Muhich, C. L.; Wang, H. Efficient Conversion of Low-Concentration Nitrate Sources into Ammonia on a Ru-Dispersed Cu Nanowire Electrocatalyst. *Nat. Nanotechnol.* **2022**, 1–9. <https://doi.org/10.1038/s41565-022-01121-4>.
- (10) Katsounaros, I.; Kyriacou, G. Influence of the Concentration and the Nature of the Supporting Electrolyte on the Electrochemical Reduction of Nitrate on Tin Cathode. *Electrochimica Acta* **2007**, *52* (23), 6412–6420. <https://doi.org/10.1016/j.electacta.2007.04.050>.

- (11) Wang, Y.; Li, H.; Zhou, W.; Zhang, X.; Zhang, B.; Yu, Y. Structurally Disordered RuO<sub>2</sub> Nanosheets with Rich Oxygen Vacancies for Enhanced Nitrate Electroreduction to Ammonia. *Angewandte Chemie* **2022**, *134* (19), e202202604. <https://doi.org/10.1002/ange.202202604>.
- (12) Guo, J.; Brimley, P.; Liu, M. J.; Corson, E. R.; Muñoz, C.; Smith, W. A.; Tarpeh, W. A. Mass Transport Modifies the Interfacial Electrolyte to Influence Electrochemical Nitrate Reduction. *ACS Sustainable Chem. Eng.* **2023**, *11* (20), 7882–7893. <https://doi.org/10.1021/acssuschemeng.3c01057>.
- (13) Zhong, C.; Deng, Y.; Hu, W.; Qiao, J.; Zhang, L.; Zhang, J. A Review of Electrolyte Materials and Compositions for Electrochemical Supercapacitors. *Chemical Society Reviews* **2015**, *44* (21), 7484–7539. <https://doi.org/10.1039/C5CS00303B>.
- (14) Jackson, M. N.; Jung, O.; Lamotte, H. C.; Surendranath, Y. Donor-Dependent Promotion of Interfacial Proton-Coupled Electron Transfer in Aqueous Electrocatalysis. *ACS Catal.* **2019**, *9* (4), 3737–3743. <https://doi.org/10.1021/acscatal.9b00056>.
- (15) Da Silva, S.; Basséguy, R.; Bergel, A. Electrochemical Deprotonation of Phosphate on Stainless Steel. *Electrochimica Acta* **2004**, *49* (26), 4553–4561. <https://doi.org/10.1016/j.electacta.2004.04.039>.
- (16) Marcandalli, G.; Boterman, K.; Koper, M. T. M. Understanding Hydrogen Evolution Reaction in Bicarbonate Buffer. *Journal of Catalysis* **2022**, *405*, 346–354. <https://doi.org/10.1016/j.jcat.2021.12.012>.
- (17) Lim, J.; Liu, C.-Y.; Park, J.; Liu, Y.-H.; Senftle, T. P.; Lee, S. W.; Hatzell, M. C. Structure Sensitivity of Pd Facets for Enhanced Electrochemical Nitrate Reduction to Ammonia. *ACS Catal.* **2021**, *11* (12), 7568–7577. <https://doi.org/10.1021/acscatal.1c01413>.
- (18) Liu, M. J.; Guo, J.; Hoffman, A. S.; Stenlid, J. H.; Tang, M. T.; Corson, E. R.; Stone, K. H.; Abild-Pedersen, F.; Bare, S. R.; Tarpeh, W. A. Catalytic Performance and Near-Surface X-Ray Characterization of Titanium Hydride Electrodes for the Electrochemical Nitrate Reduction Reaction. *J. Am. Chem. Soc.* **2022**, *144* (13), 5739–5744. <https://doi.org/10.1021/jacs.2c01274>.
- (19) *CXM-200 (CMI-7000) Cation Exchange Membranes | Technical Specifications*. Membranes International Inc. <https://ionexchangemembranes.com/cmi-7000-cation-exchange-membranes-technical-specifications/> (accessed 2024-02-06).
- (20) Kim, J. M.; Lin, Y.; Hunter, B.; Beckingham, B. S. Transport and Co-Transport of Carboxylate Ions and Ethanol in Anion Exchange Membranes. *Polymers* **2021**, *13* (17), 2885. <https://doi.org/10.3390/polym13172885>.
- (21) Rosenberg, N. W.; Tirrell, C. E. Limiting Currents in Membrane Cells. *Ind. Eng. Chem.* **1957**, *49* (4), 780–784. <https://doi.org/10.1021/ie50568a047>.
- (22) El-Nagar, G. A.; Haun, F.; Gupta, S.; Stojkovic, S.; Mayer, M. T. Unintended Cation Crossover Influences CO<sub>2</sub> Reduction Selectivity in Cu-Based Zero-Gap Electrolysers. *Nat Commun* **2023**, *14* (1), 2062. <https://doi.org/10.1038/s41467-023-37520-x>.
- (23) Rodrigues, M.; de Mattos, T. T.; Sleutels, T.; ter Heijne, A.; Hamelers, H. V. M.; Buisman, C. J. N.; Kuntke, P. Minimal Bipolar Membrane Cell Configuration for Scaling Up Ammonium Recovery. *ACS Sustainable Chem. Eng.* **2020**, *8* (47), 17359–17367. <https://doi.org/10.1021/acssuschemeng.0c05043>.
- (24) Lee, G.; Kim, K.; Chung, J.; Han, J.-I. Electrochemical Ammonia Accumulation and Recovery from Ammonia-Rich Livestock Wastewater. *Chemosphere* **2021**, *270*, 128631. <https://doi.org/10.1016/j.chemosphere.2020.128631>.

- (25) Kim, K.-Y.; Moreno-Jimenez, D. A.; Efstathiadis, H. Electrochemical Ammonia Recovery from Anaerobic Centrate Using a Nickel-Functionalized Activated Carbon Membrane Electrode. *Environ. Sci. Technol.* **2021**, *55* (11), 7674–7680. <https://doi.org/10.1021/acs.est.1c01703>.
- (26) Aung, S. L.; Choi, J.; Cha, H.; Woo, G.; Song, K. G. Ammonia-Selective Recovery from Anaerobic Digestate Using Electrochemical Ammonia Stripping Combined with Electrodialysis. *Chemical Engineering Journal* **2024**, *479*, 147949. <https://doi.org/10.1016/j.cej.2023.147949>.
- (27) Sun, J.; Garg, S.; Waite, T. D. A Novel Integrated Flow-Electrode Capacitive Deionization and Flow Cathode System for Nitrate Removal and Ammonia Generation from Simulated Groundwater. *Environ. Sci. Technol.* **2023**. <https://doi.org/10.1021/acs.est.3c03922>.
- (28) Shi, N.; Gao, J.; Li, K.; Li, Y.; Zhang, W.; Yang, Q.; Jiang, B. Upcycling Wastewater Nitrate into Ammonia Fertilizer via Concurrent Electrocatalysis and Membrane Extraction. *Chemical Engineering Journal* **2023**, *455*, 140959. <https://doi.org/10.1016/j.cej.2022.140959>.
- (29) Kim, K.; Zagalskaya, A.; Ng, J. L.; Hong, J.; Alexandrov, V.; Pham, T. A.; Su, X. Coupling Nitrate Capture with Ammonia Production through Bifunctional Redox-Electrodes. *Nat Commun* **2023**, *14* (1), 823. <https://doi.org/10.1038/s41467-023-36318-1>.
- (30) Gao, J.; Shi, N.; Li, Y.; Jiang, B.; Marhaba, T.; Zhang, W. Electrocatalytic Upcycling of Nitrate Wastewater into an Ammonia Fertilizer via an Electrified Membrane. *Environ. Sci. Technol.* **2022**. <https://doi.org/10.1021/acs.est.1c08442>.
- (31) Chen, Y.; Ammari-Azar, P.; Liu, H.; Lee, J.; Xi, Y.; Castellano, M. J.; Gu, S.; Li, W. Sustainable Waste-Nitrogen Upcycling Enabled by Low-Concentration Nitrate Electrodialysis and High-Performance Ammonia Electrosynthesis. *EES. Catal.* **2023**, *1* (4), 504–515. <https://doi.org/10.1039/D3EY00058C>.
- (32) Liu, M. J.; Miller, D. M.; Tarpeh, W. A. Reactive Separation of Ammonia from Wastewater Nitrate via Molecular Electrocatalysis. *Environ. Sci. Technol. Lett.* **2023**, *10* (5), 458–463. <https://doi.org/10.1021/acs.estlett.3c00205>.
- (33) Mayor, Á.; Vinardell, S.; Ganesan, K.; Bacardí, C.; Cortina, J. L.; Valderrama, C. Life-Cycle Assessment and Techno-Economic Evaluation of the Value Chain in Nutrient Recovery from Wastewater Treatment Plants for Agricultural Application. *Science of The Total Environment* **2023**, *892*, 164452. <https://doi.org/10.1016/j.scitotenv.2023.164452>.
- (34) Reboredo Bonilla, D. Techno-Economic Evaluation of Ion Exchange Technologies to Recover Nitrogen and Phosphorus from Municipal Wastewater. Master thesis, Universitat Politècnica de Catalunya, 2023. <https://upcommons.upc.edu/handle/2117/393713> (accessed 2024-05-19).
